# Supplementary material
Source: Elsevier journal article supplement (https://boris.unibe.ch/85309/2/mmc1.pdf)

# 21-hydroxylase PTO/THE [5]

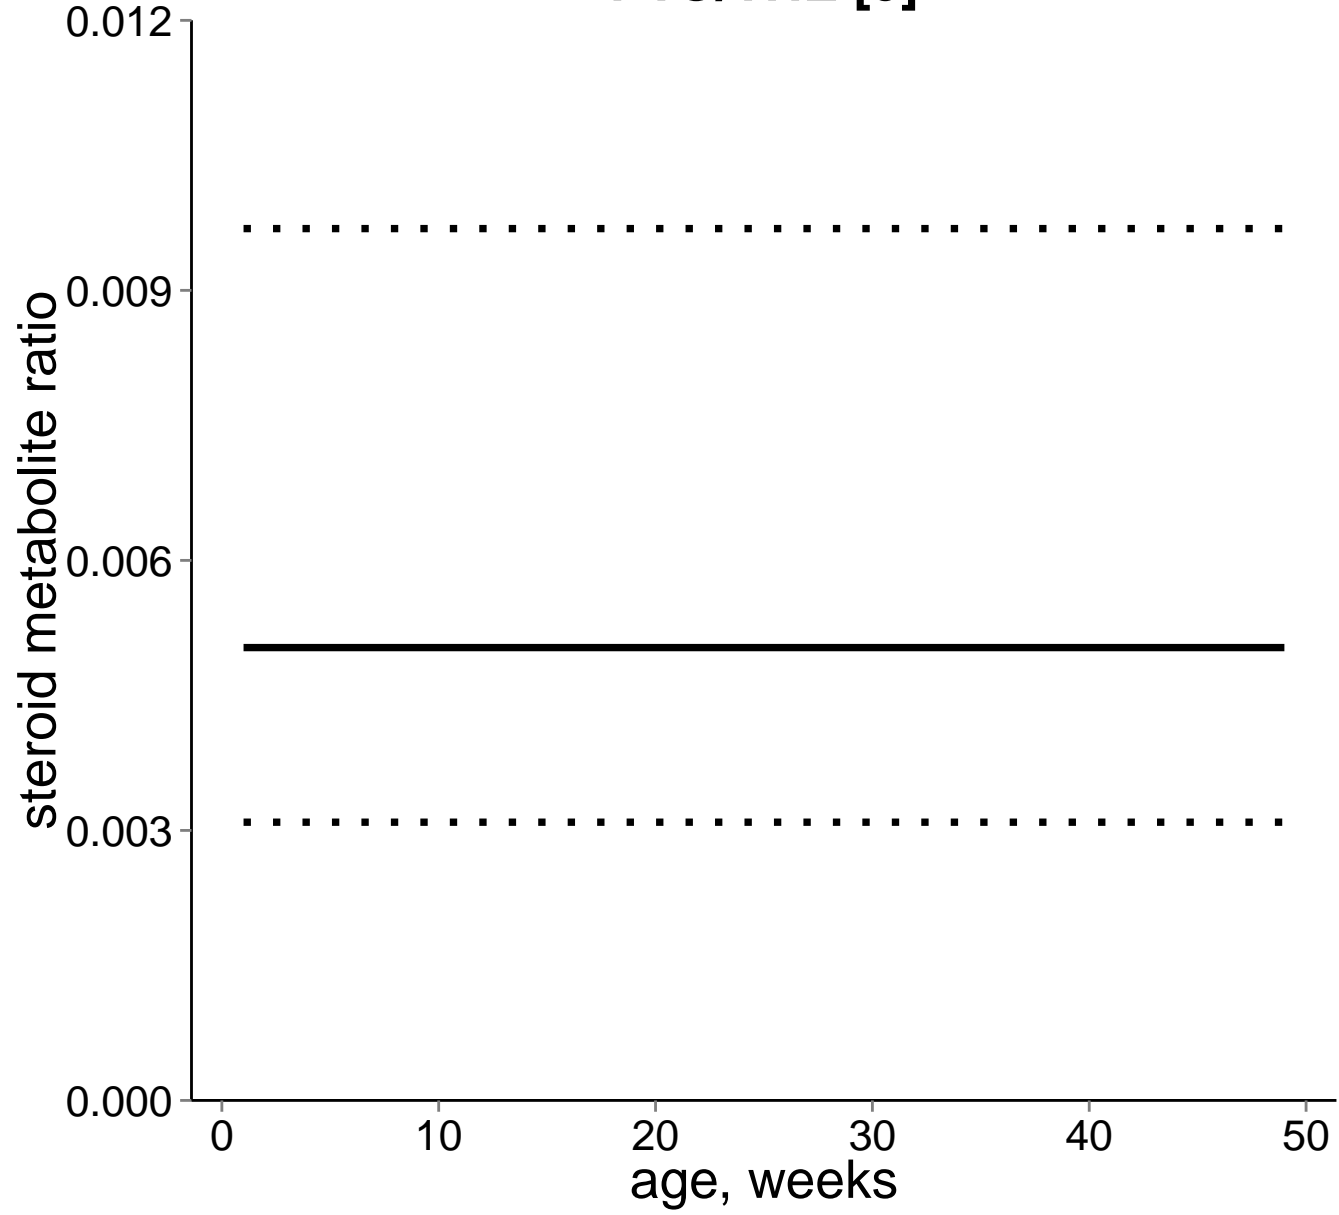

# 21-hydroxylase PTO/6OH-THE [6]

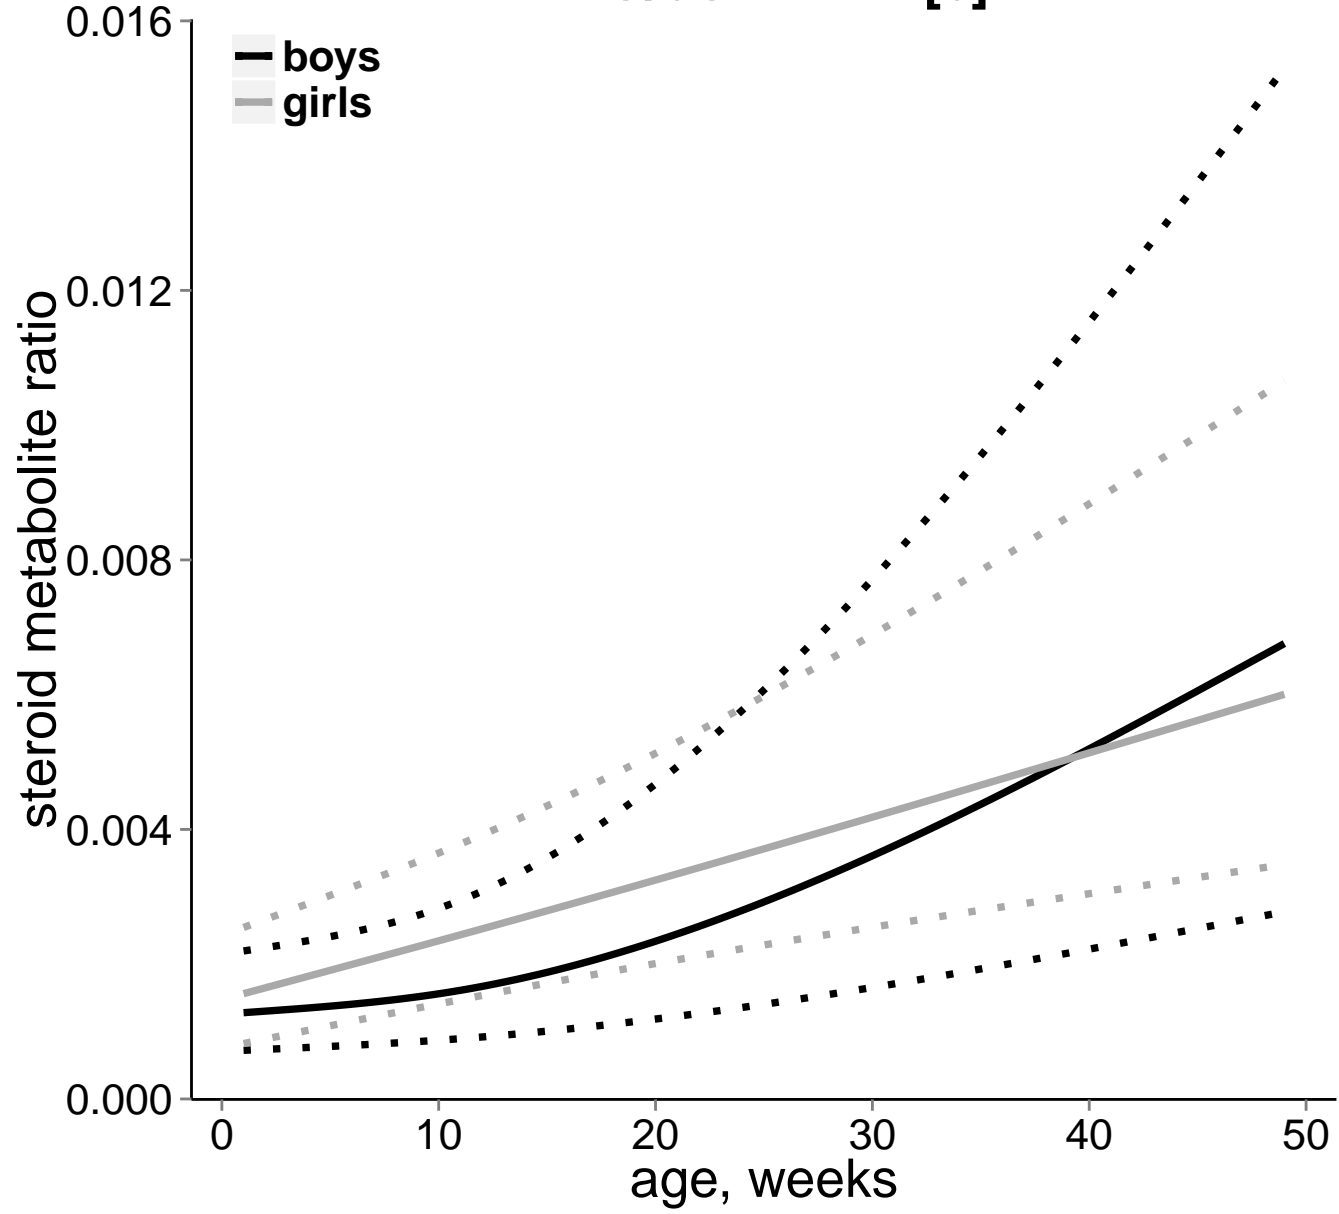

# 21-hydroxylase

## PTO/(THE+6OH-THE) [7]

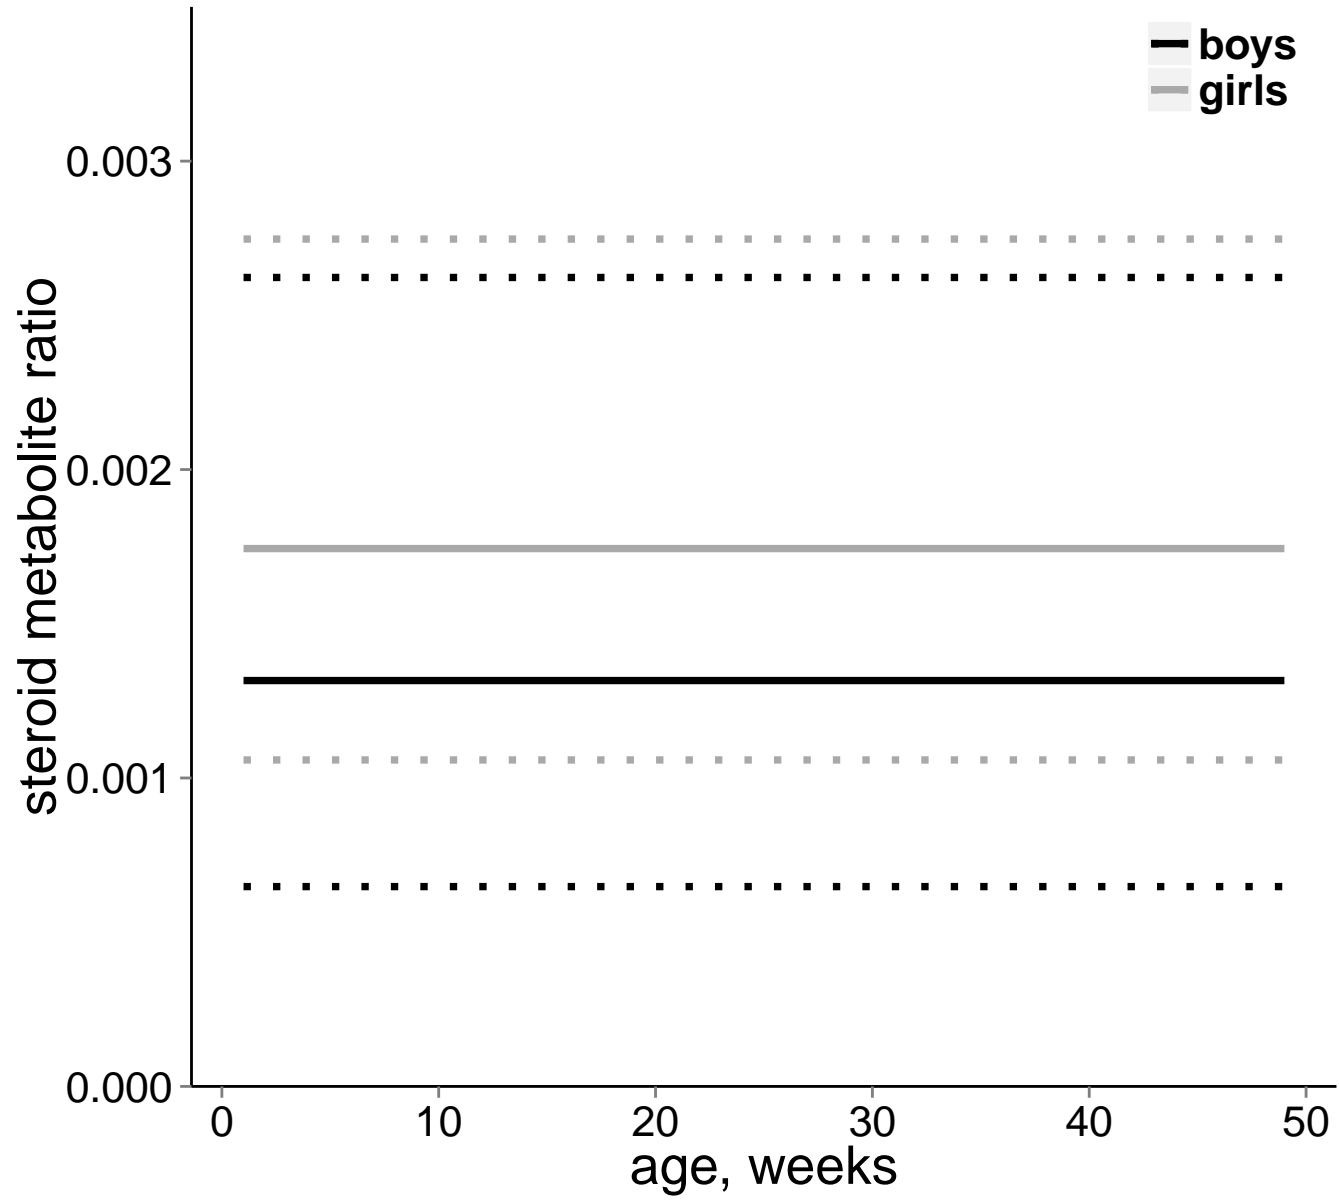

# 21-hydroxylase

## PTO/(THE+6OH-THE+6OH-β-CI) [8]

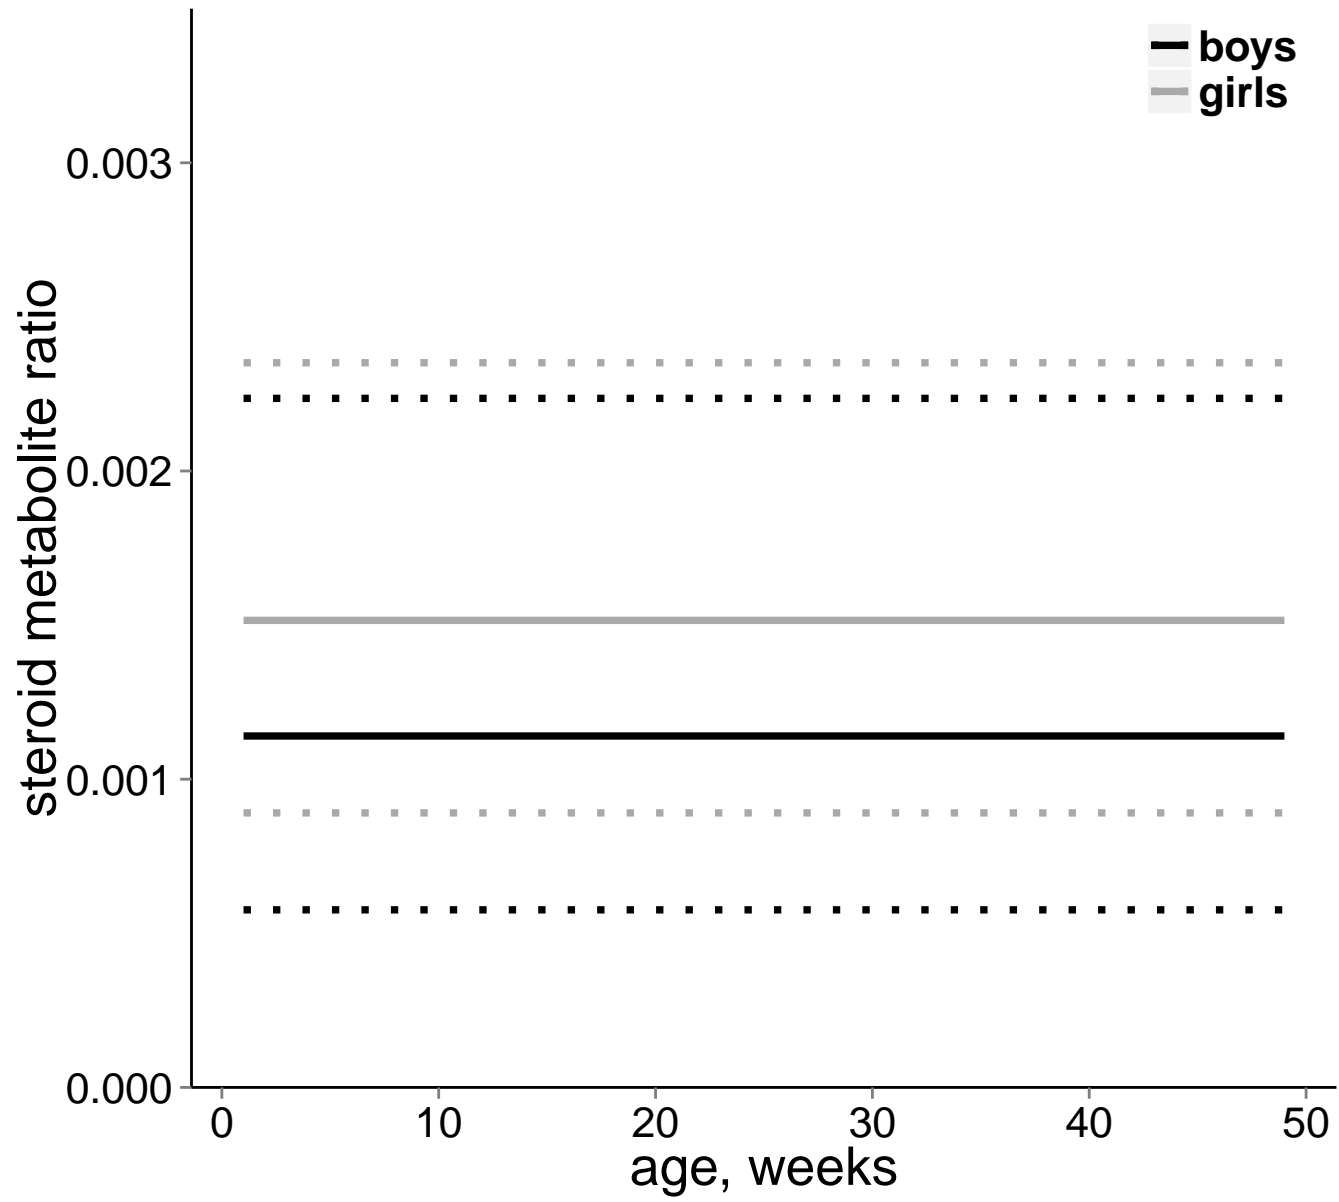

**3 $\beta$ -HSD**  
**5PT/THE [9]**

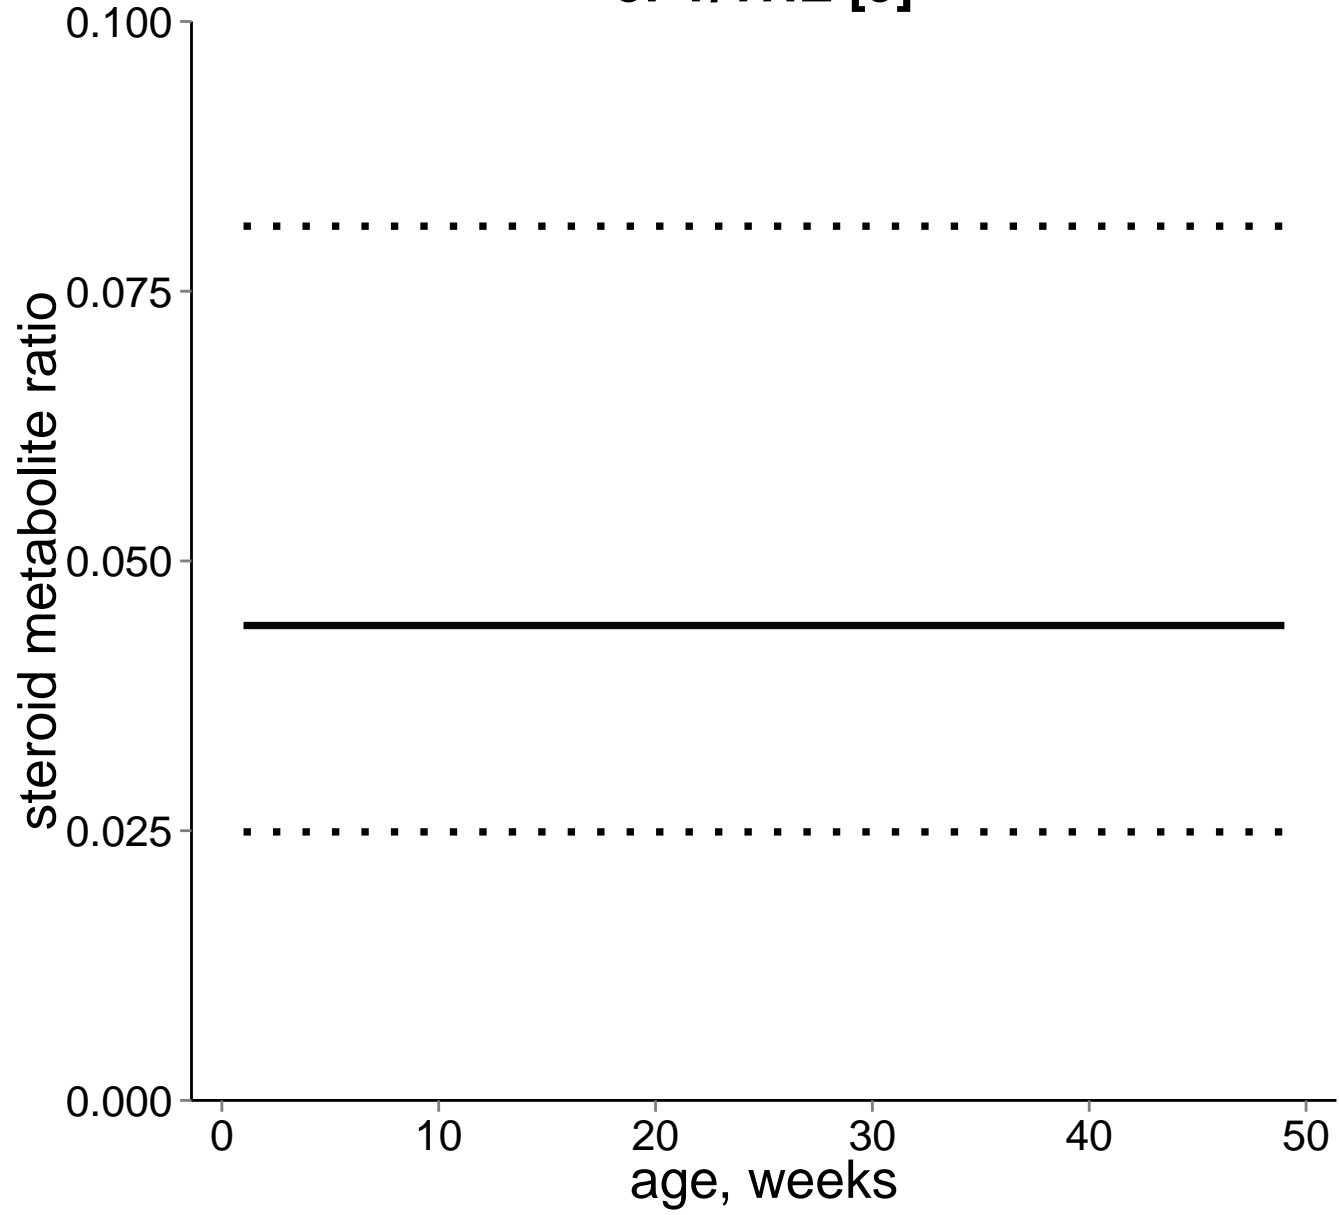

**3 $\beta$ -HSD**  
**5PT/6OH-THE [10]**

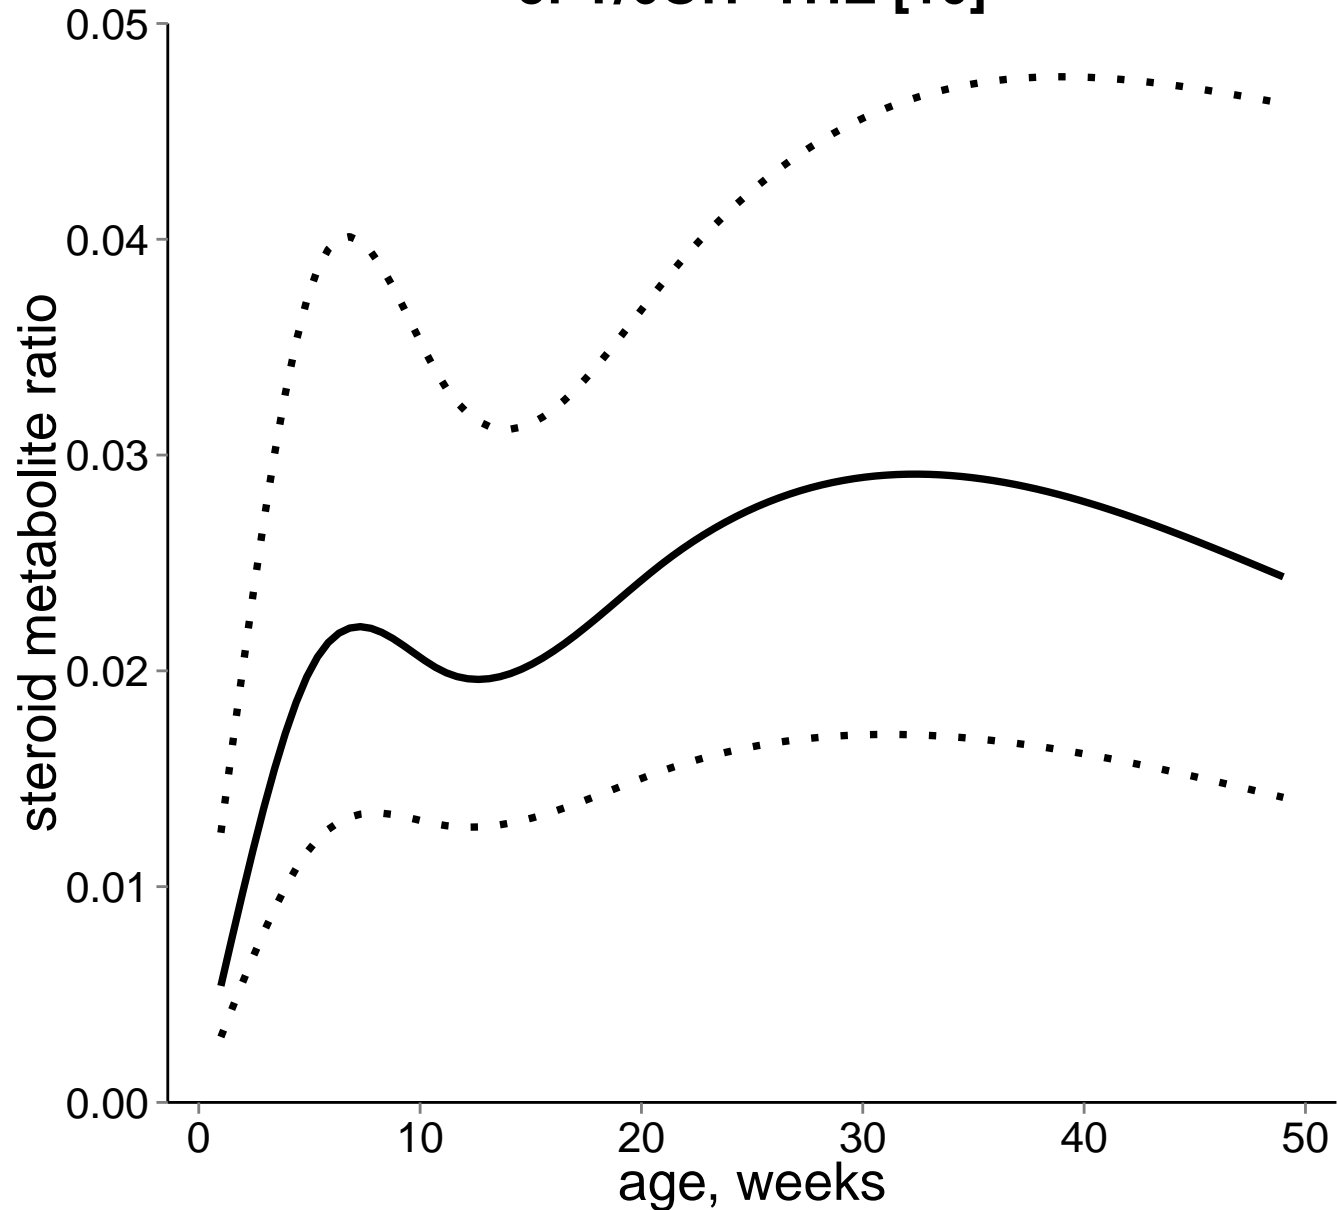

# $3\beta$ -HSD

5PT/(THE+6OH-THE) [11]

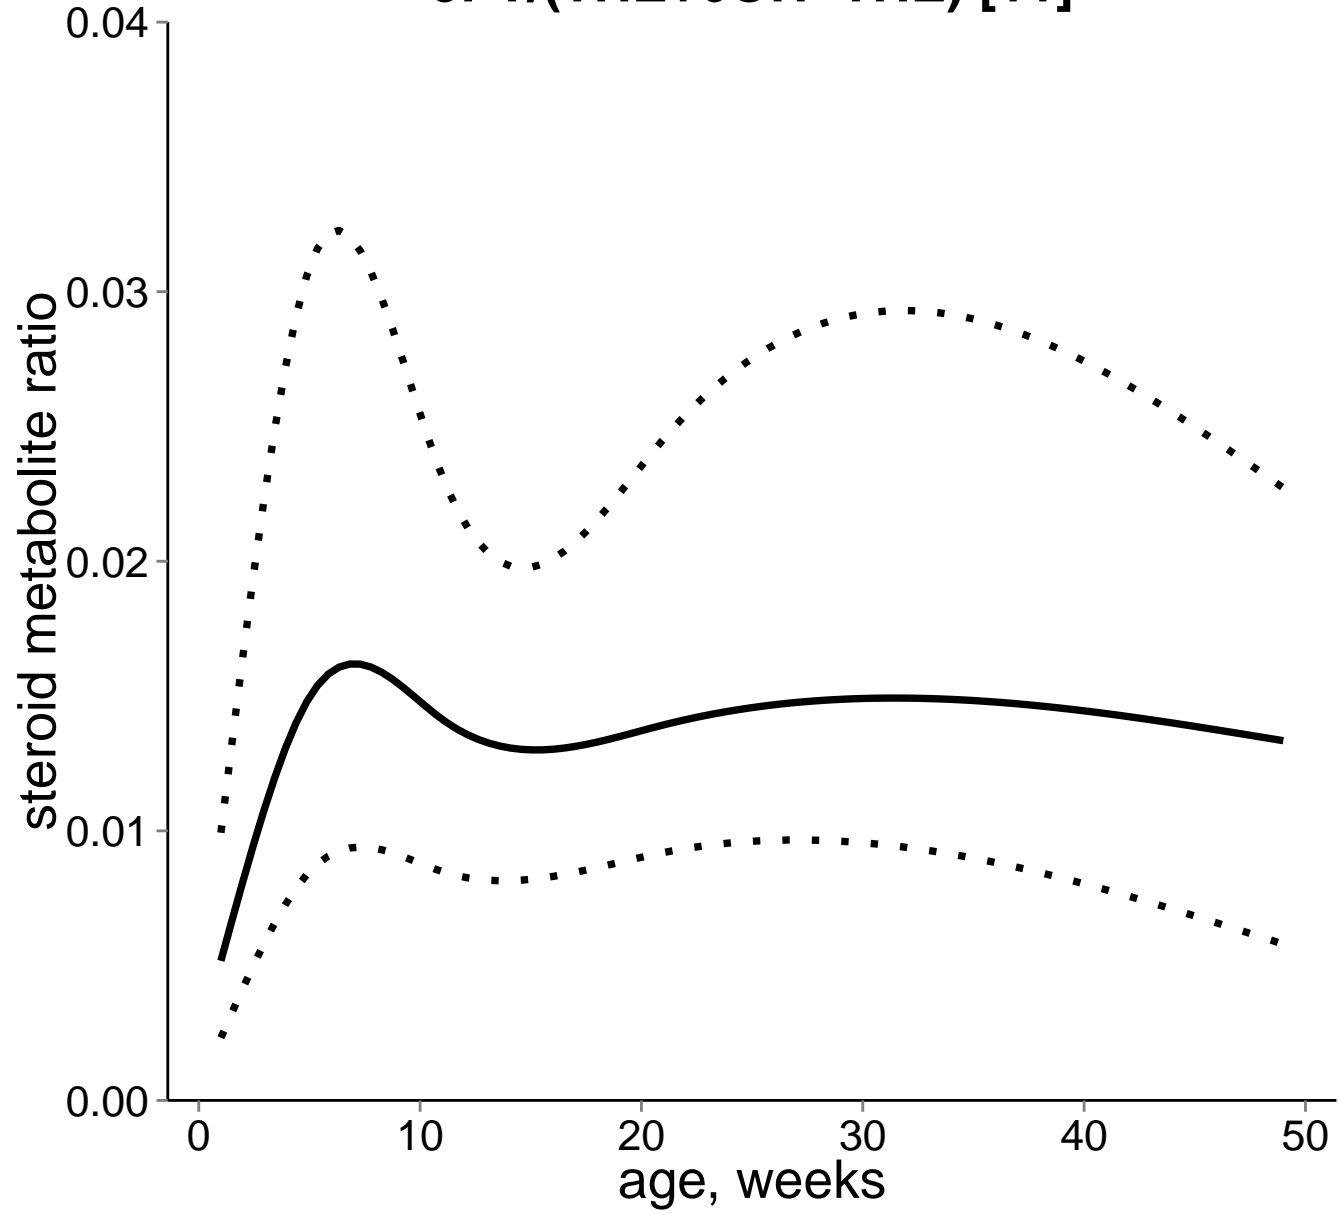

# $3\beta$ -HSD

$5PT/(THE+6OH-THE+6OH-\beta-CI)$  [12]

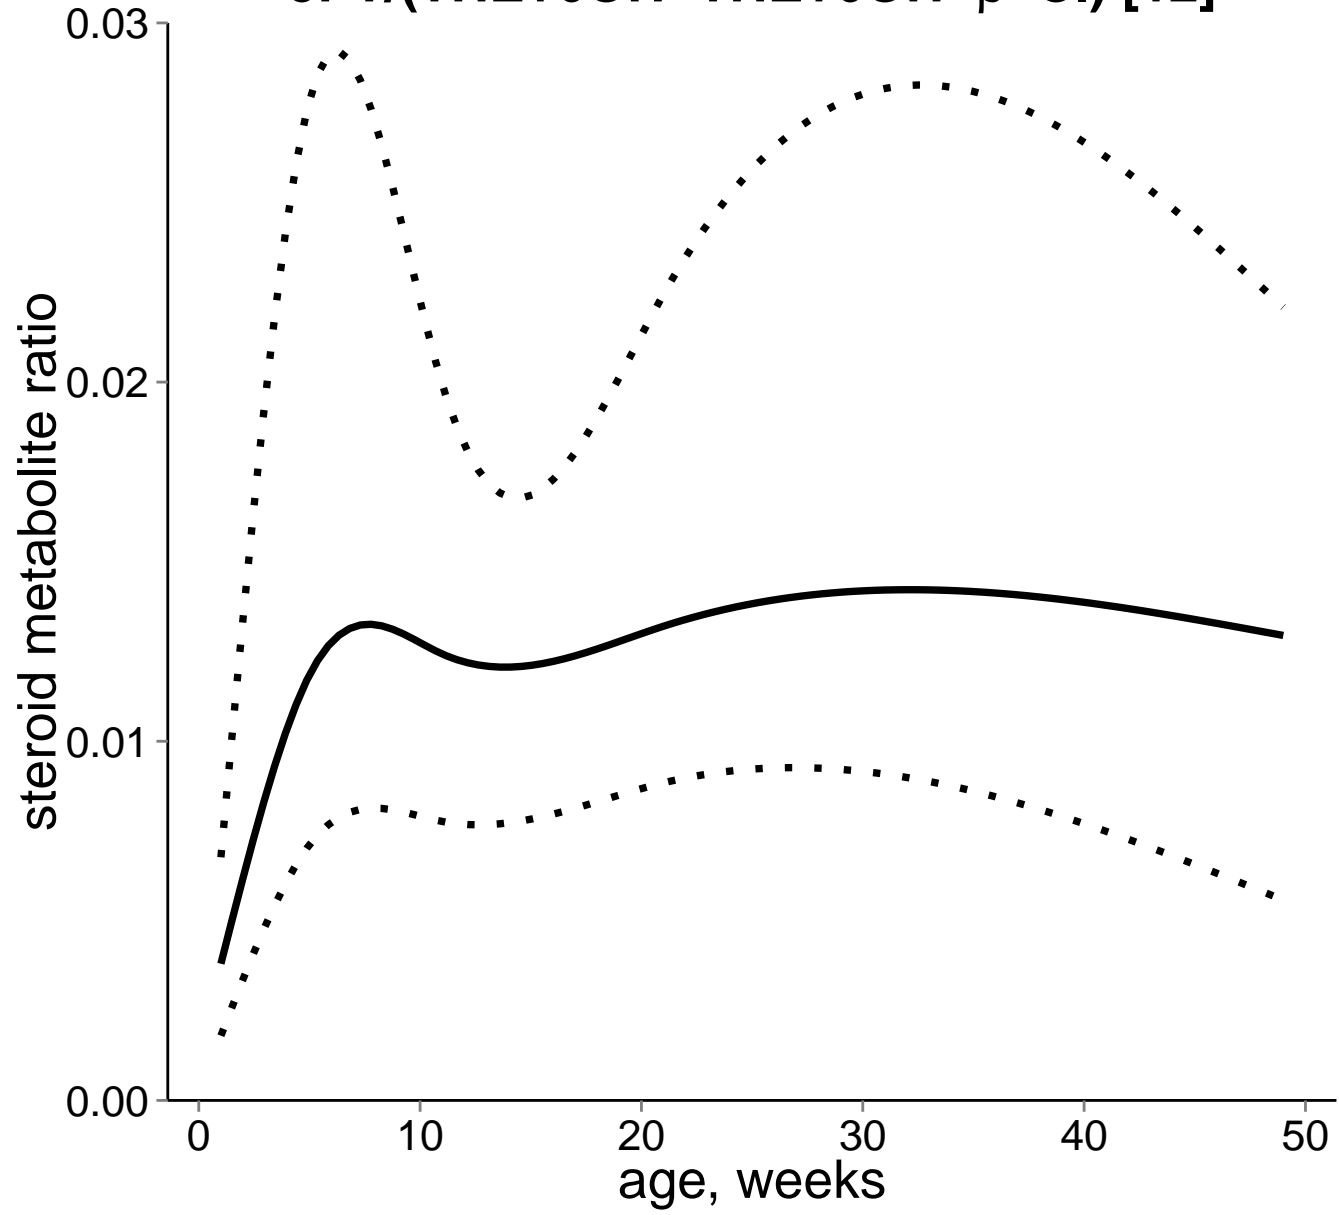



# 3 $\beta$ -HSD DHEA/THE [13]

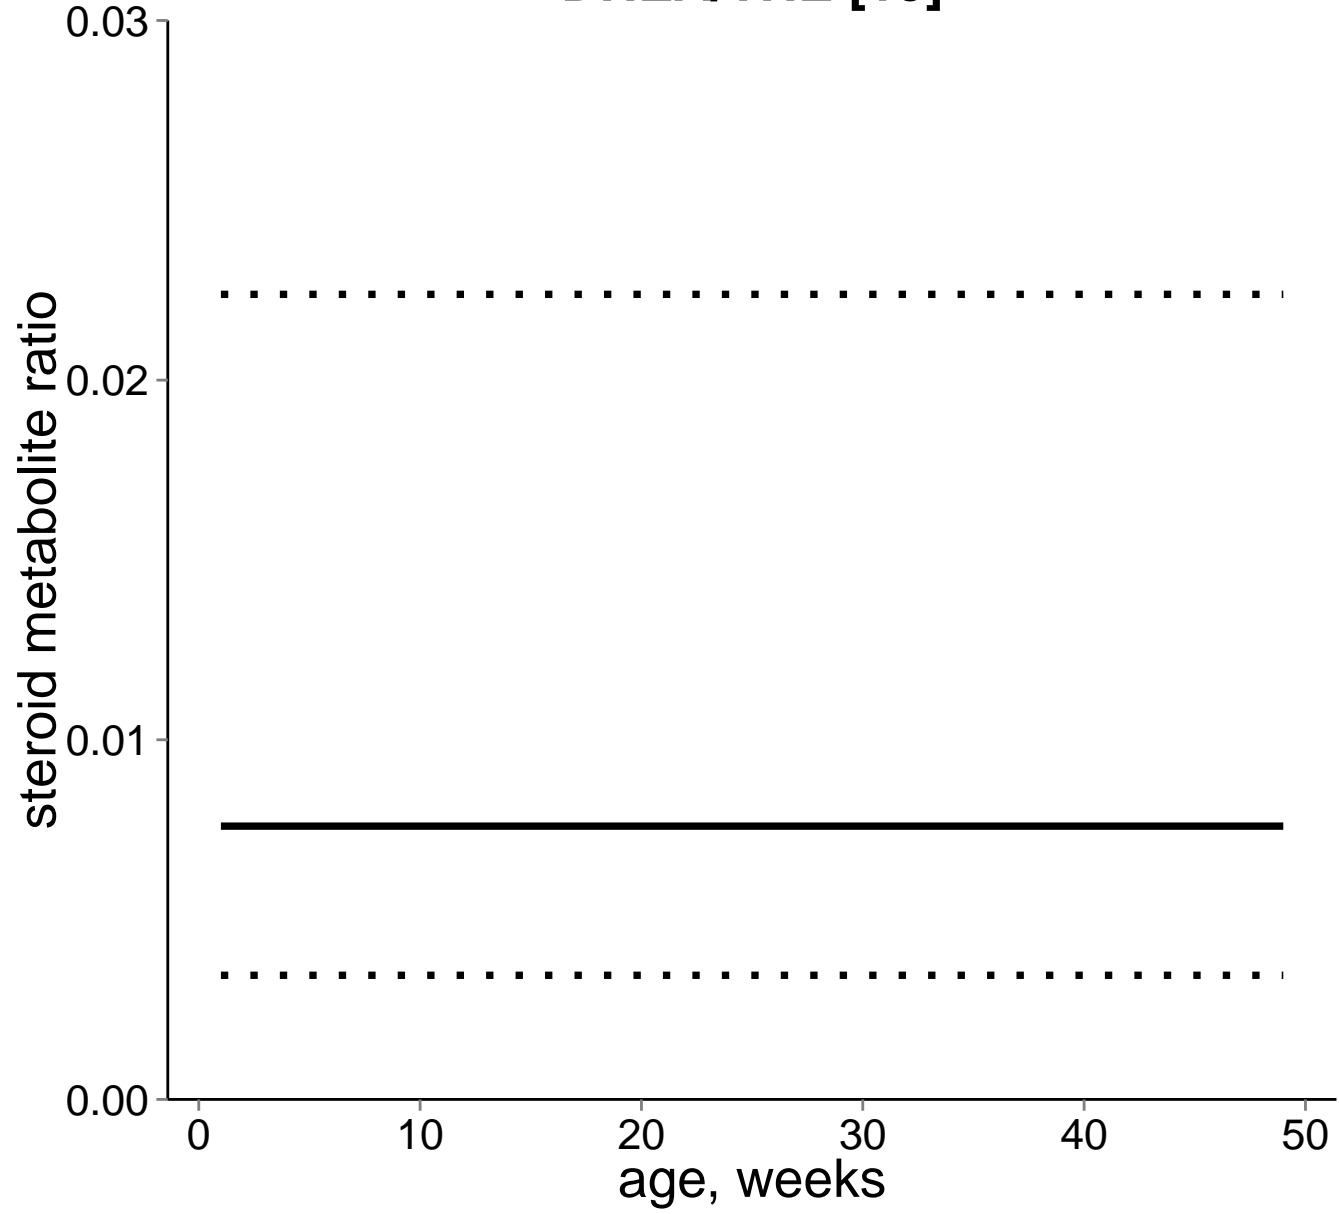

# 3 $\beta$ -HSD DHEA/6OH-THE [14]

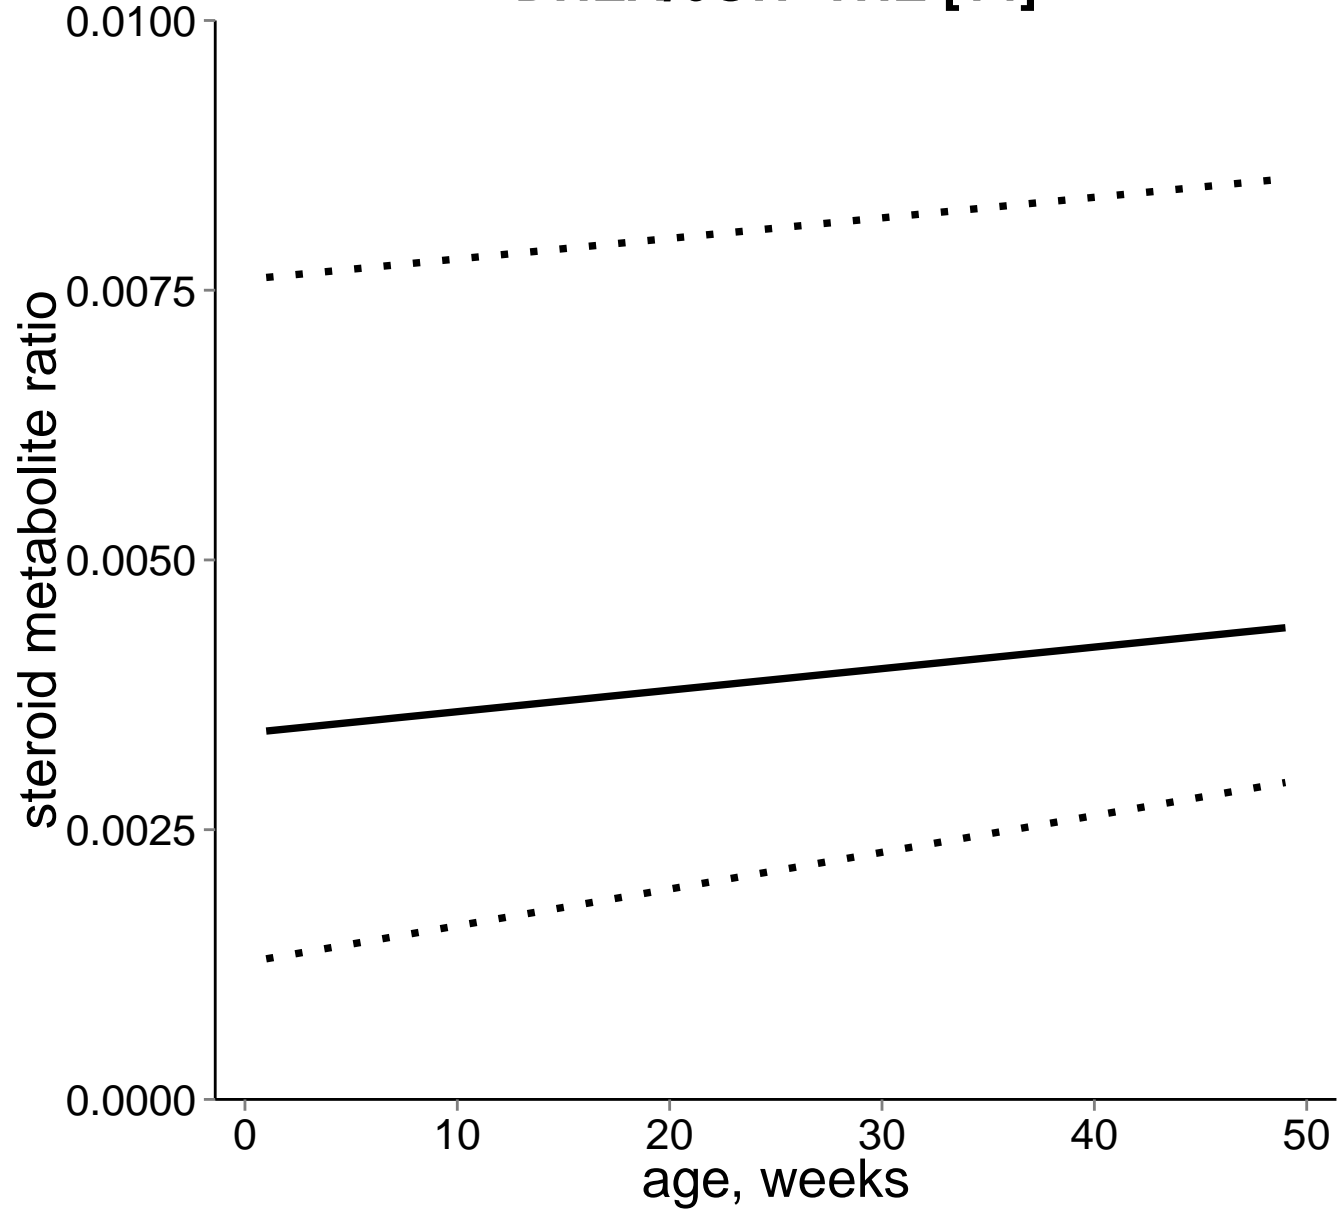

# $3\beta$ -HSD

## DHEA/(THE+6OH-THE) [15]

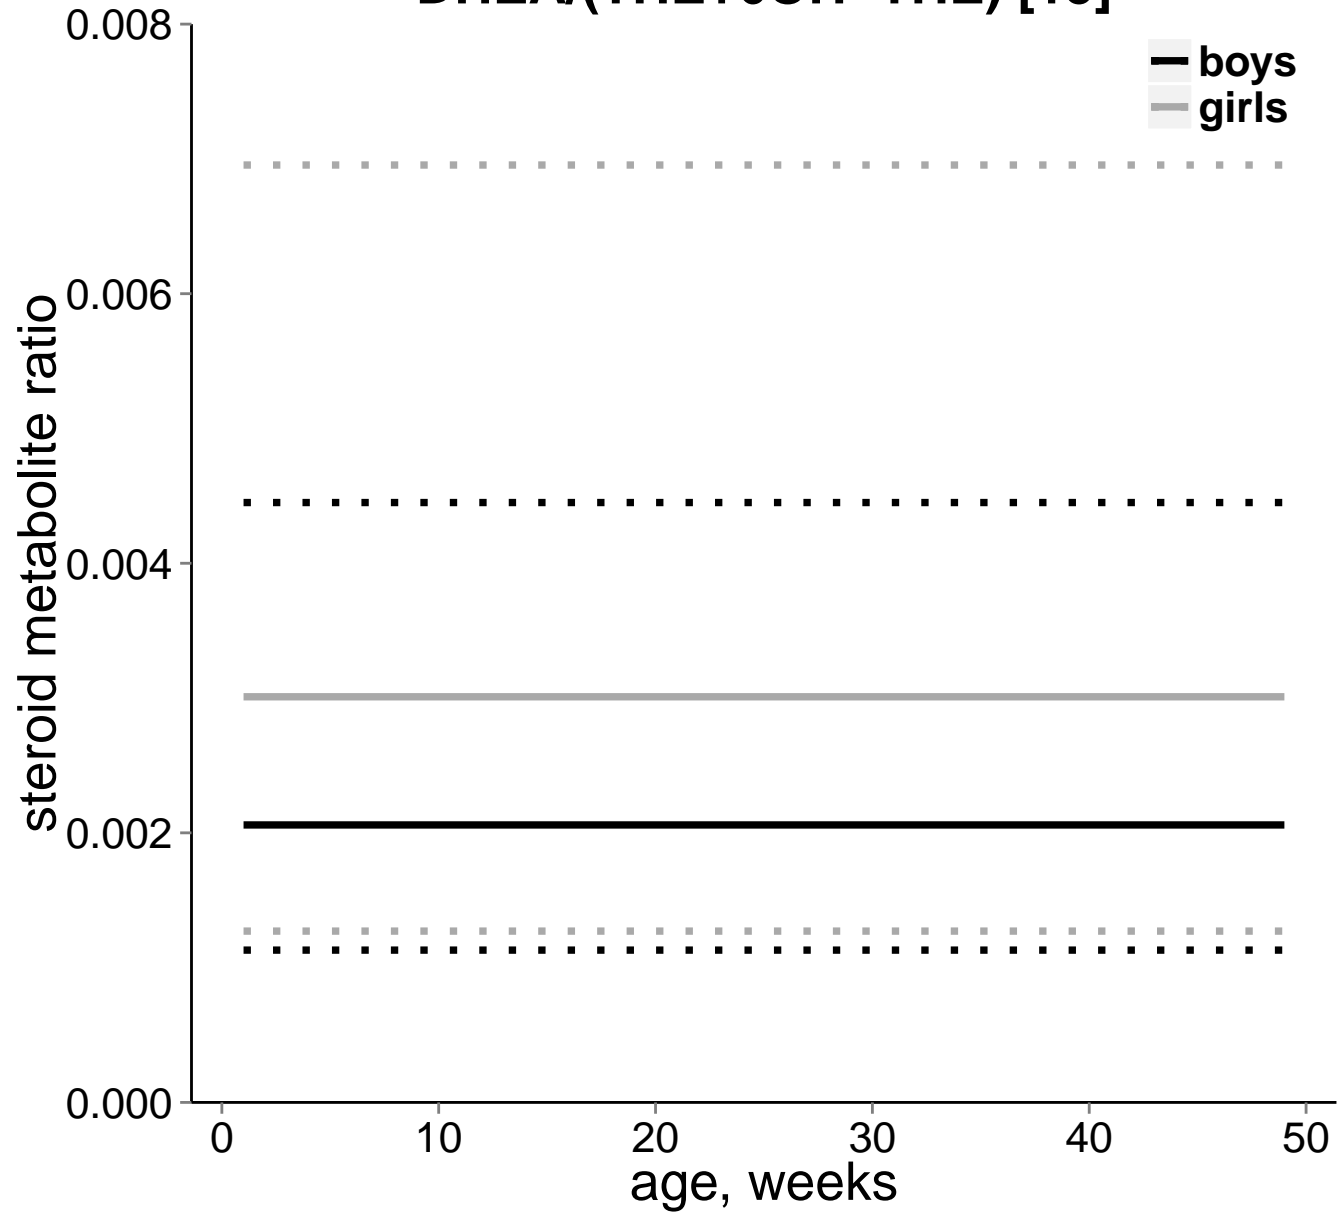

# $3\beta$ -HSD

DHEA/(THE+6OH-THE+6OH- $\beta$ -CI) [16]

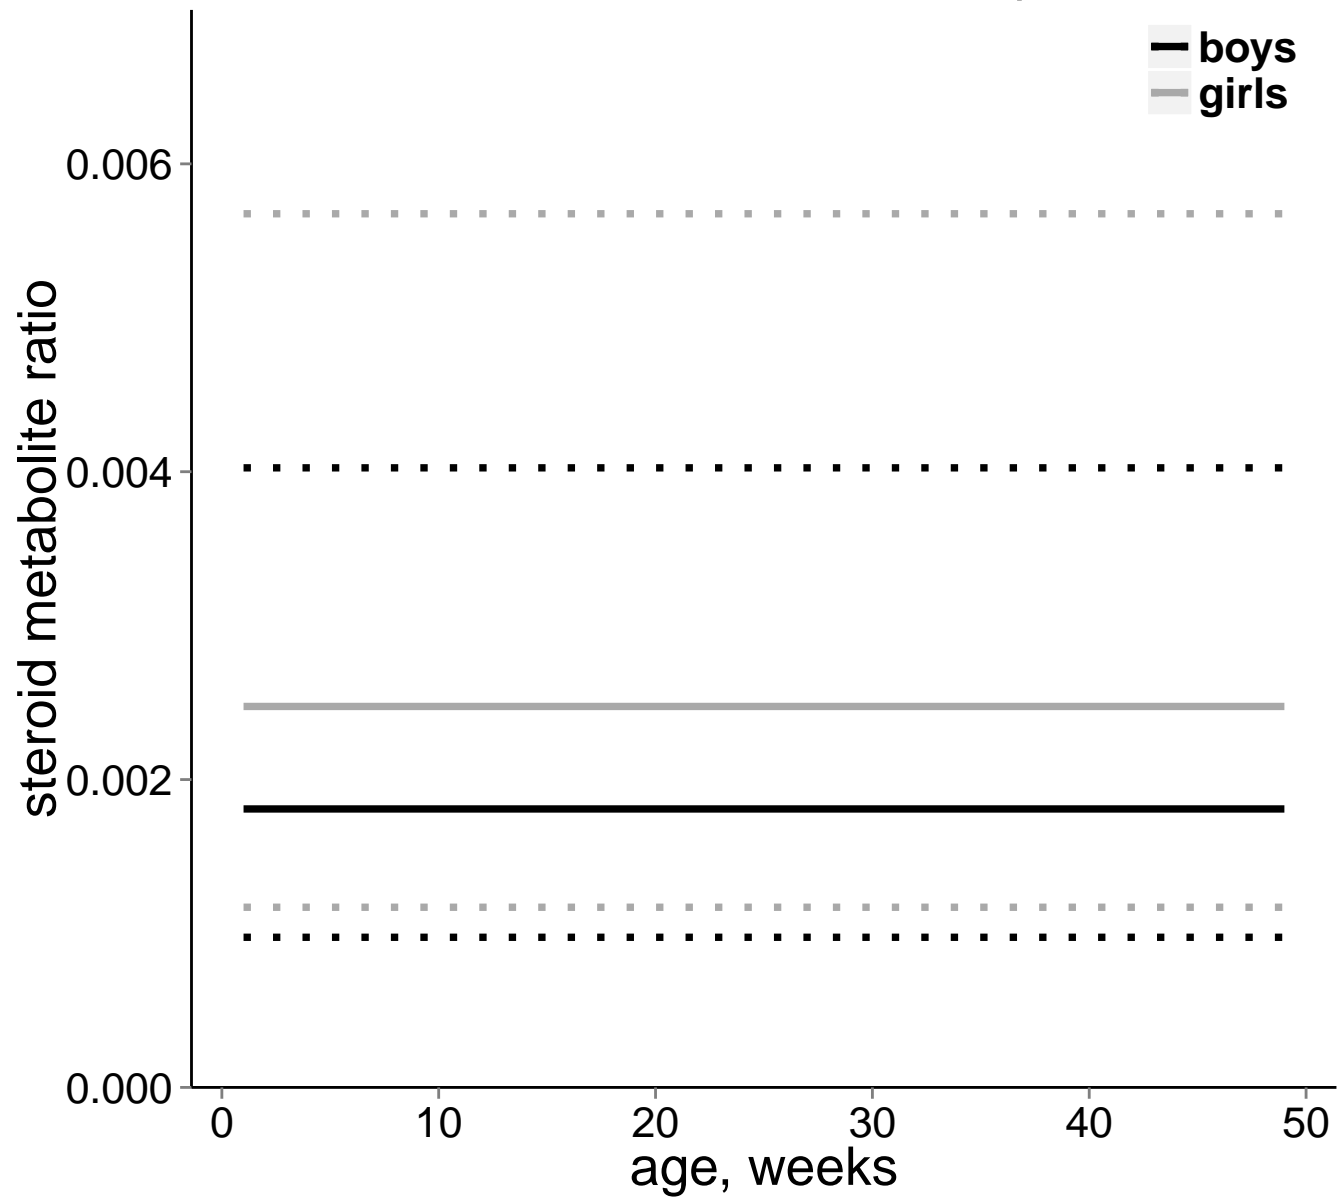

# To distinguish 21-hydroxylase from 3 $\beta$ -HSD 5PT/PTO [17]

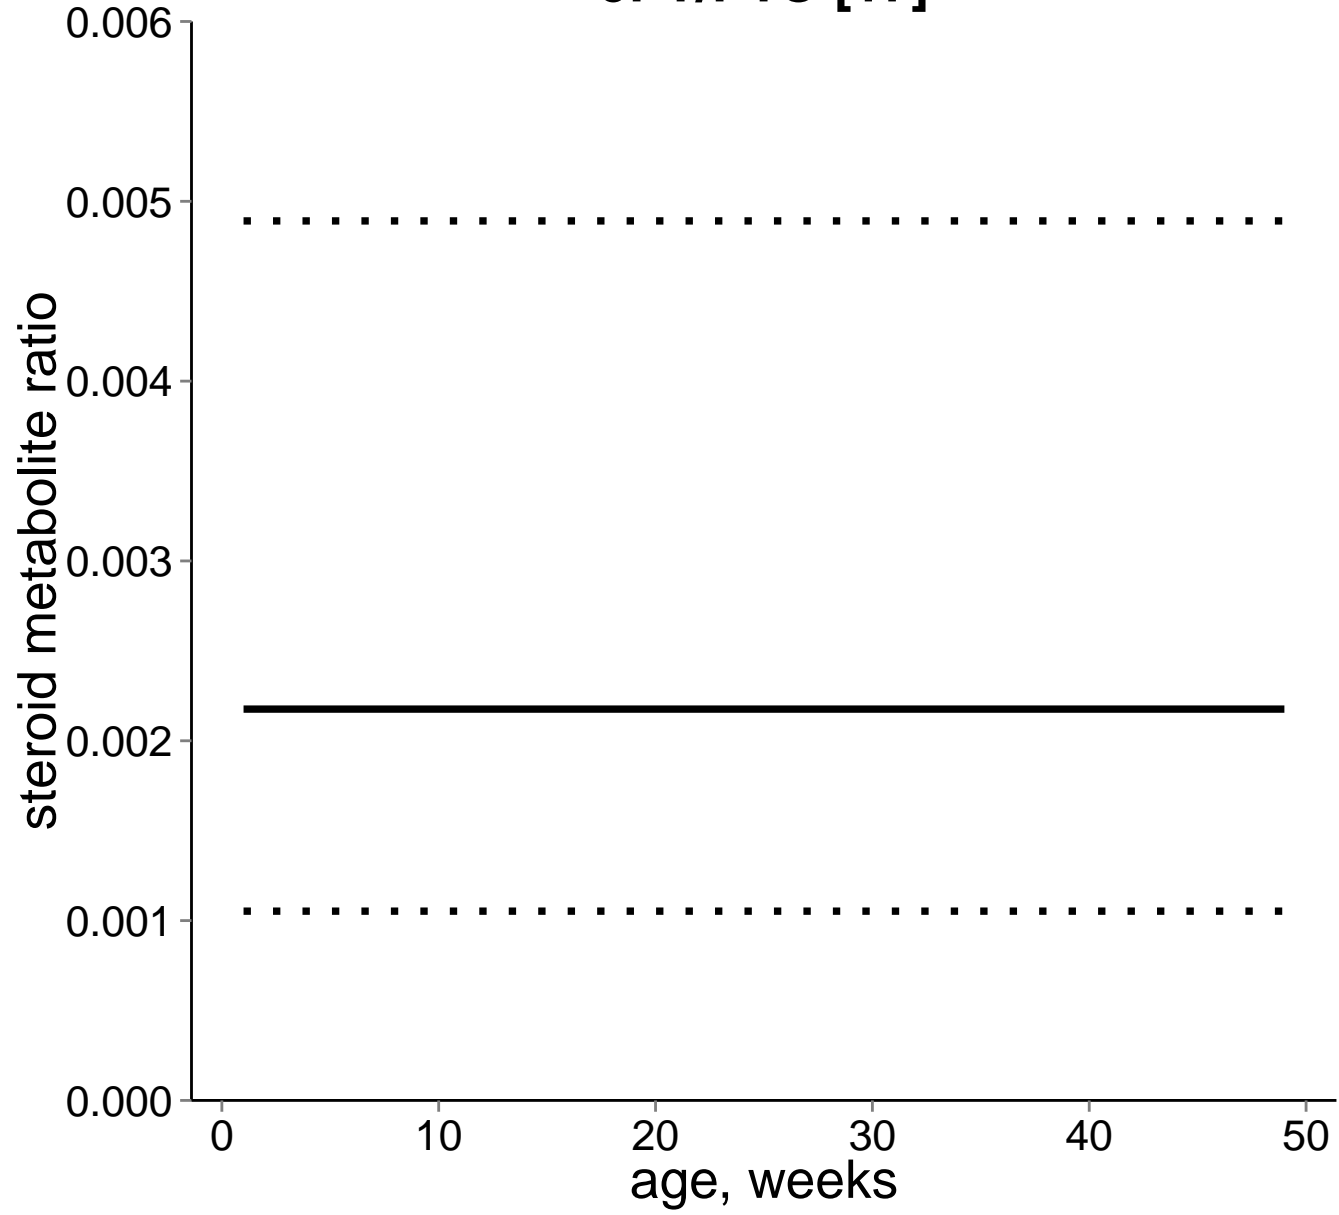

# 11 $\beta$ -hydroxylase THS/THE [18]

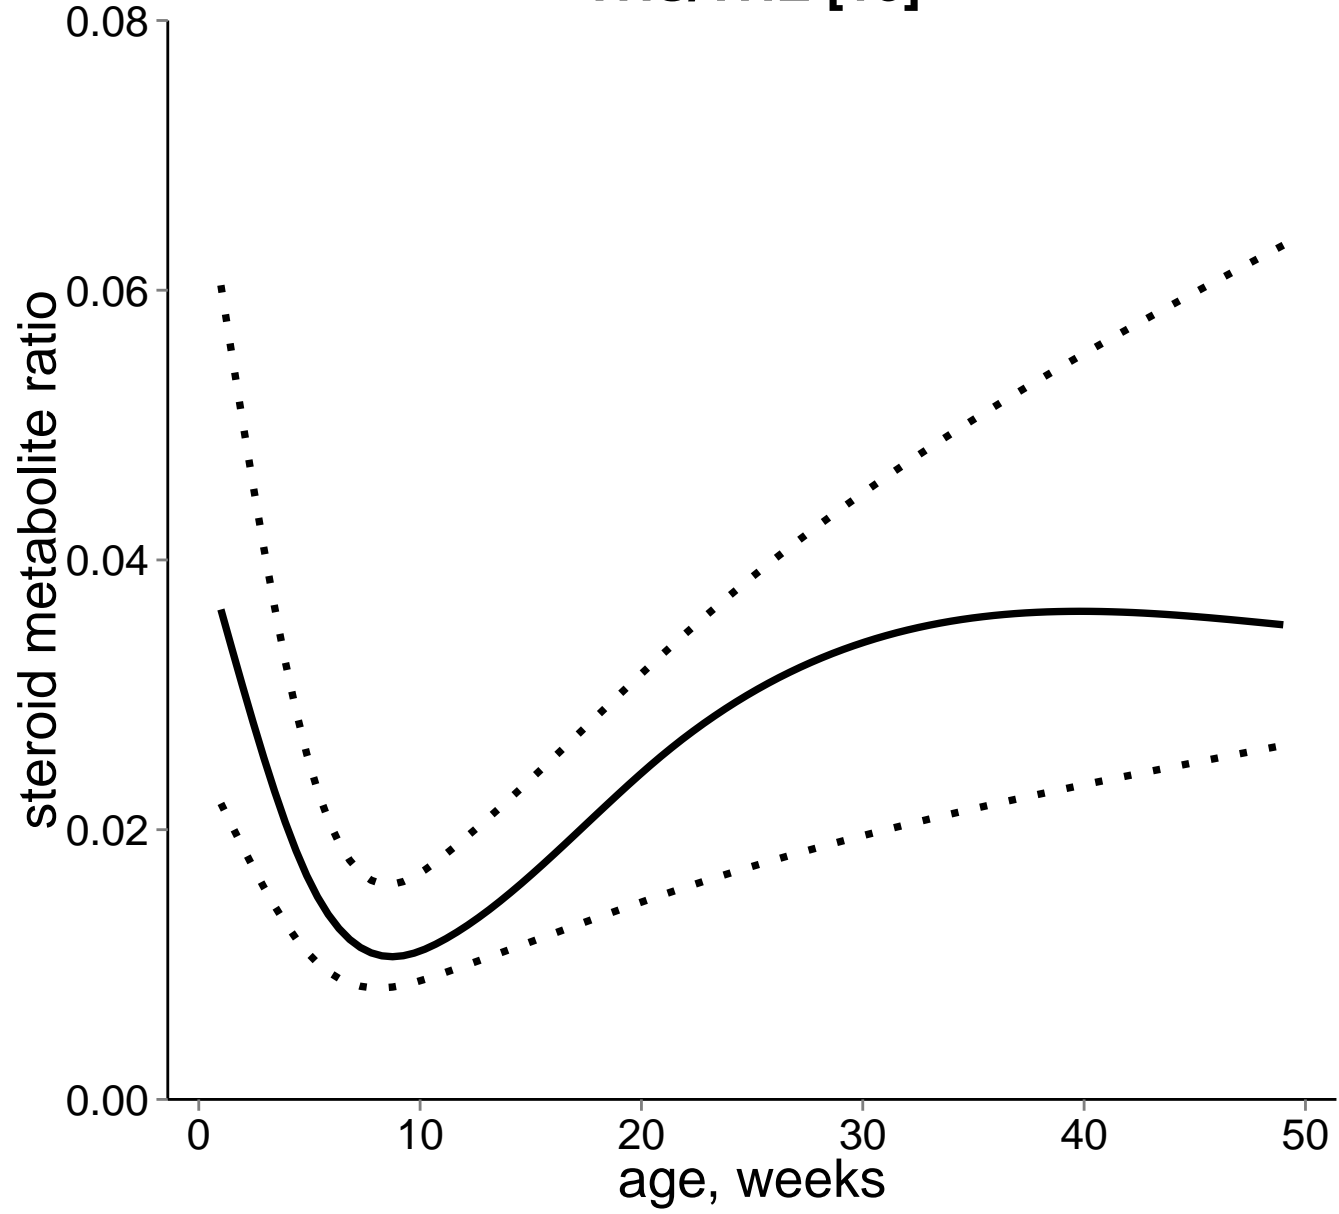

# 11 $\beta$ -hydroxylase THS/6OH-THE [19]

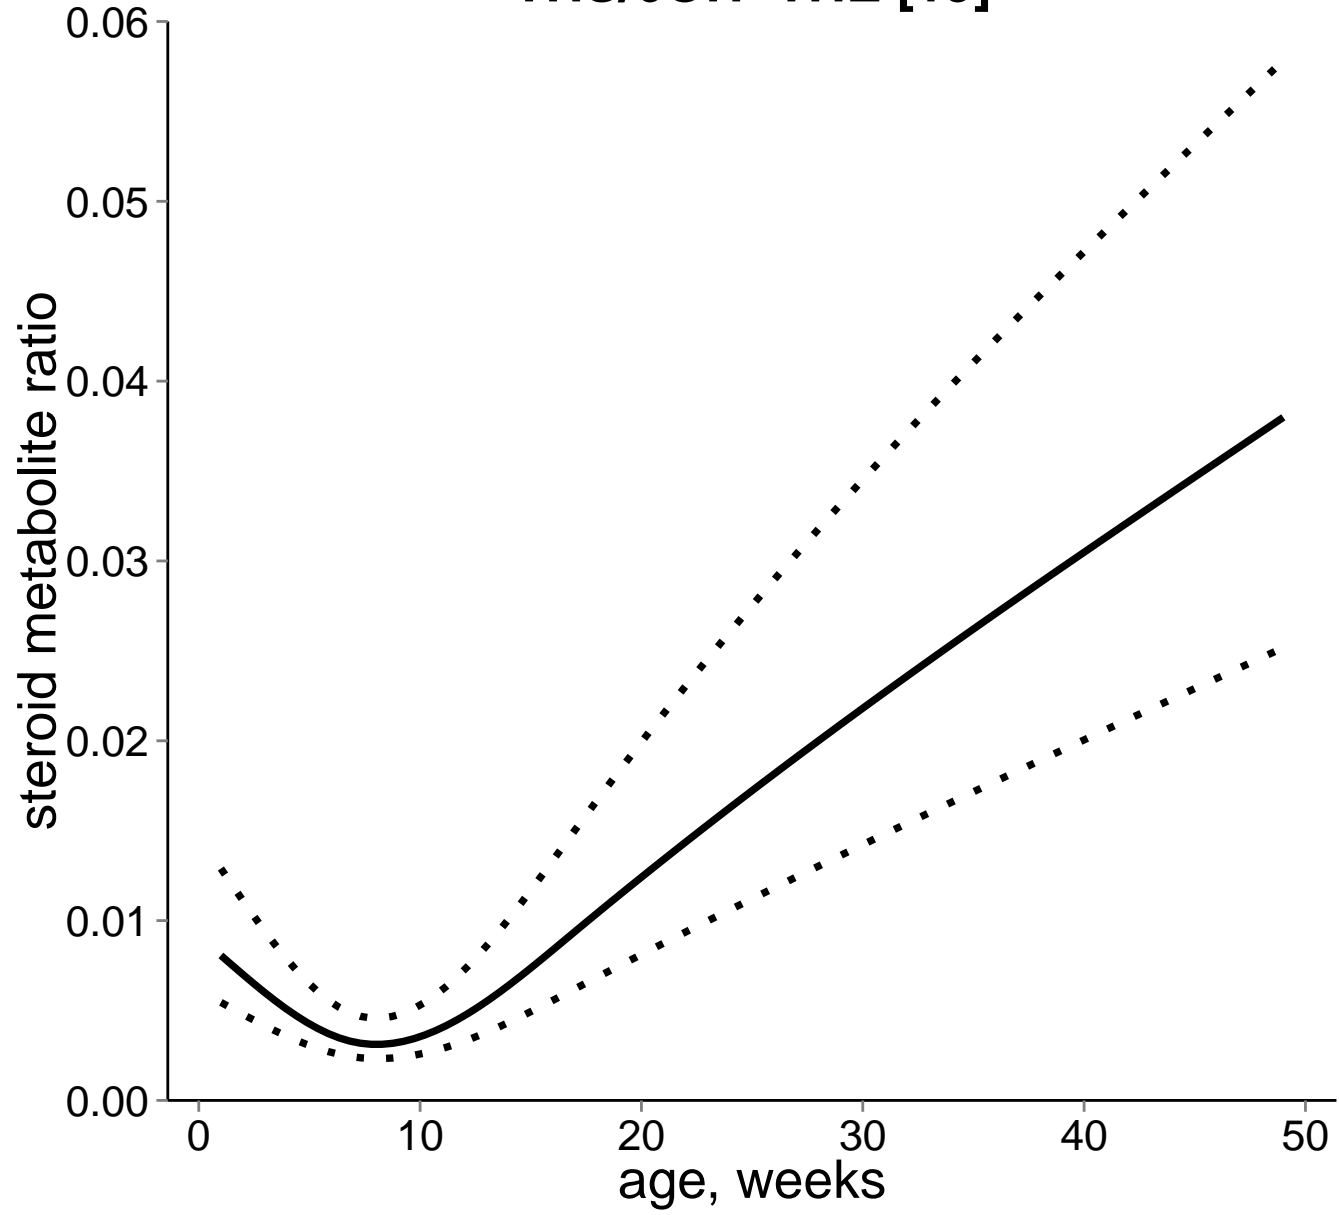

# 11 $\beta$ -hydroxylase THS/(THE+6OH-THE) [20]

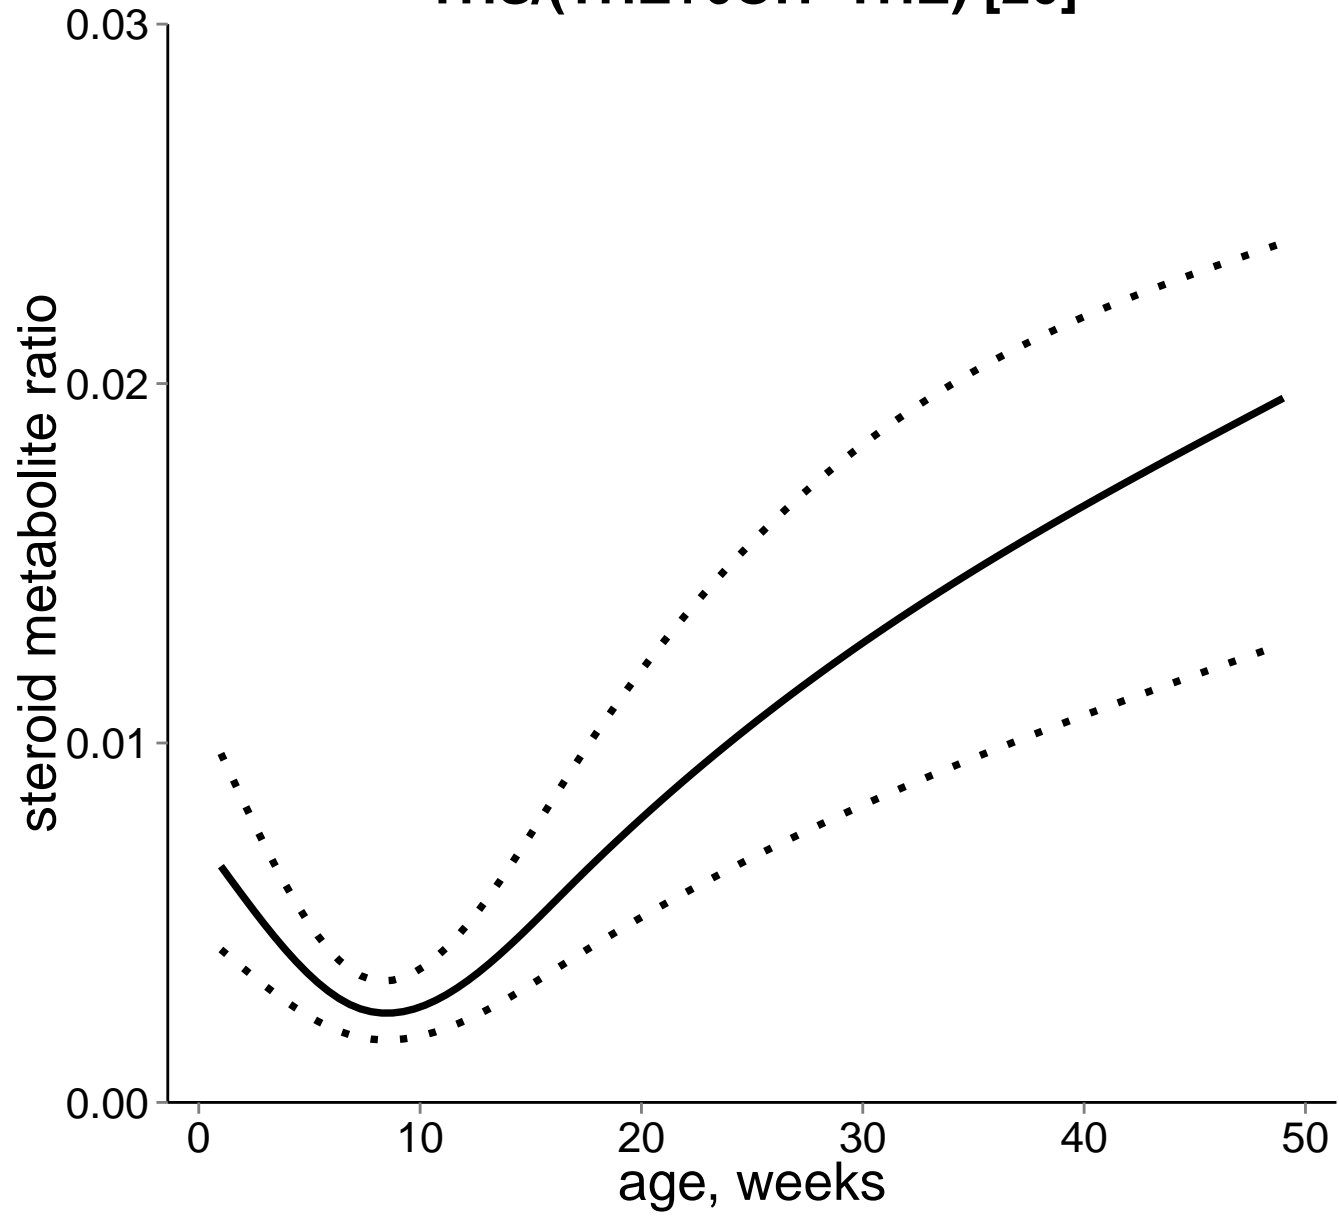



# 11 $\beta$ -hydroxylase

## THS/(THE+6OH-THE+6OH- $\beta$ -CI) [21]

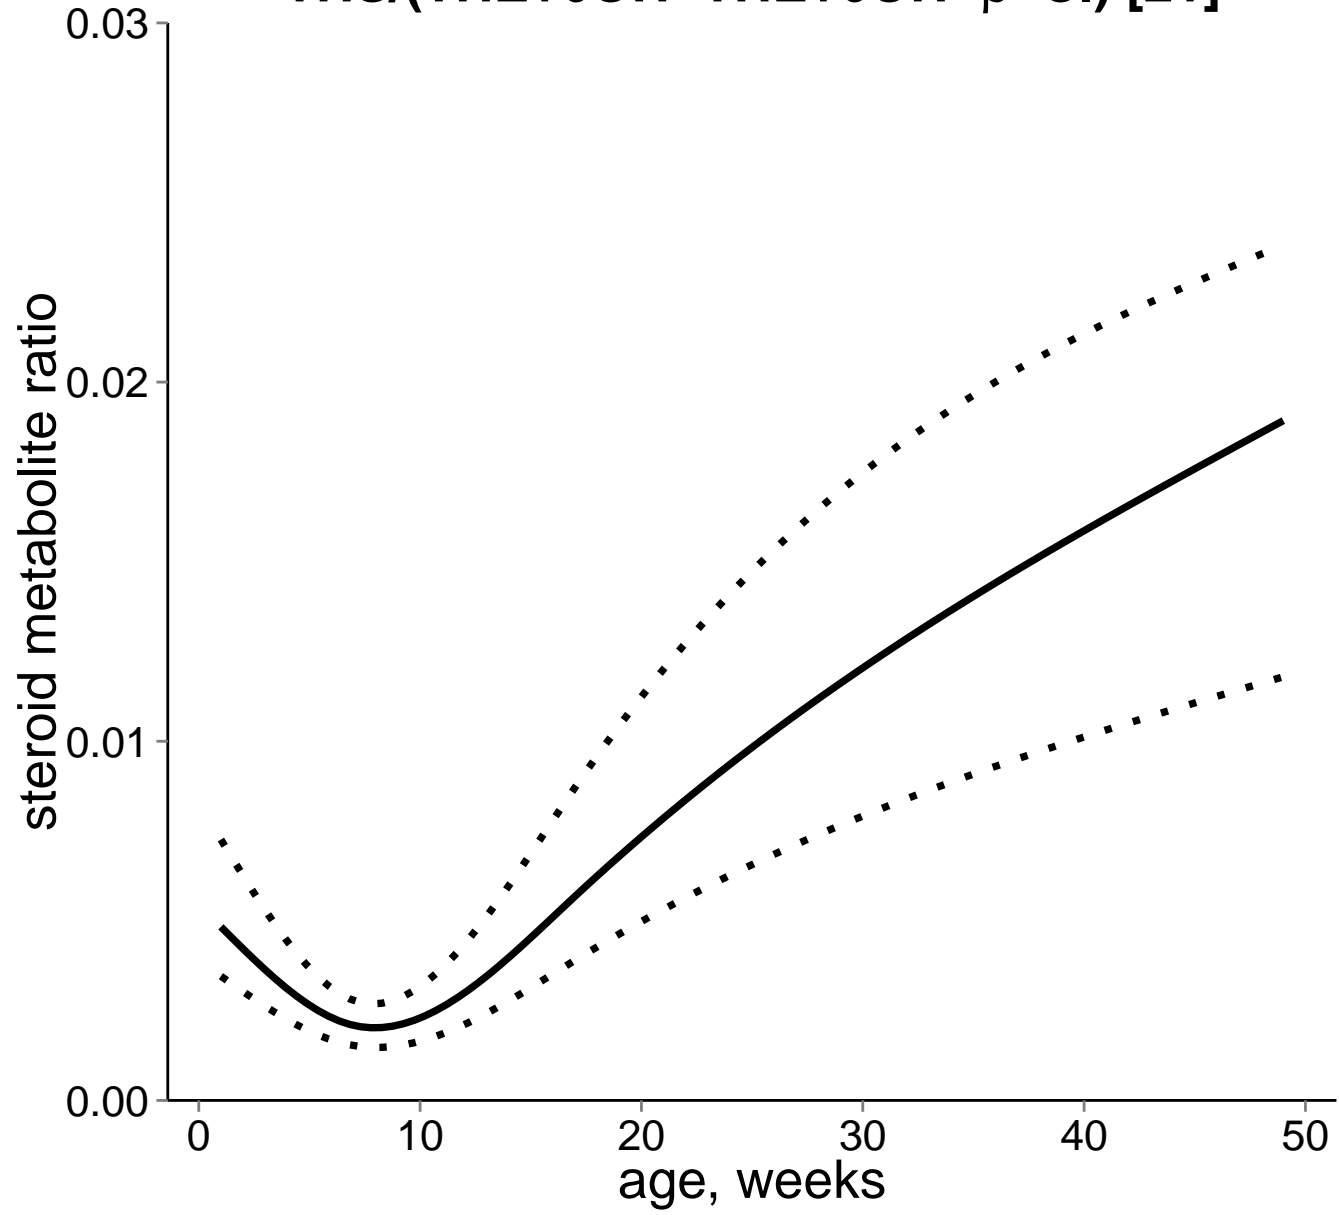

# 17 $\alpha$ -hydroxylase THA+THB+5 $\alpha$ THB/THE [22]

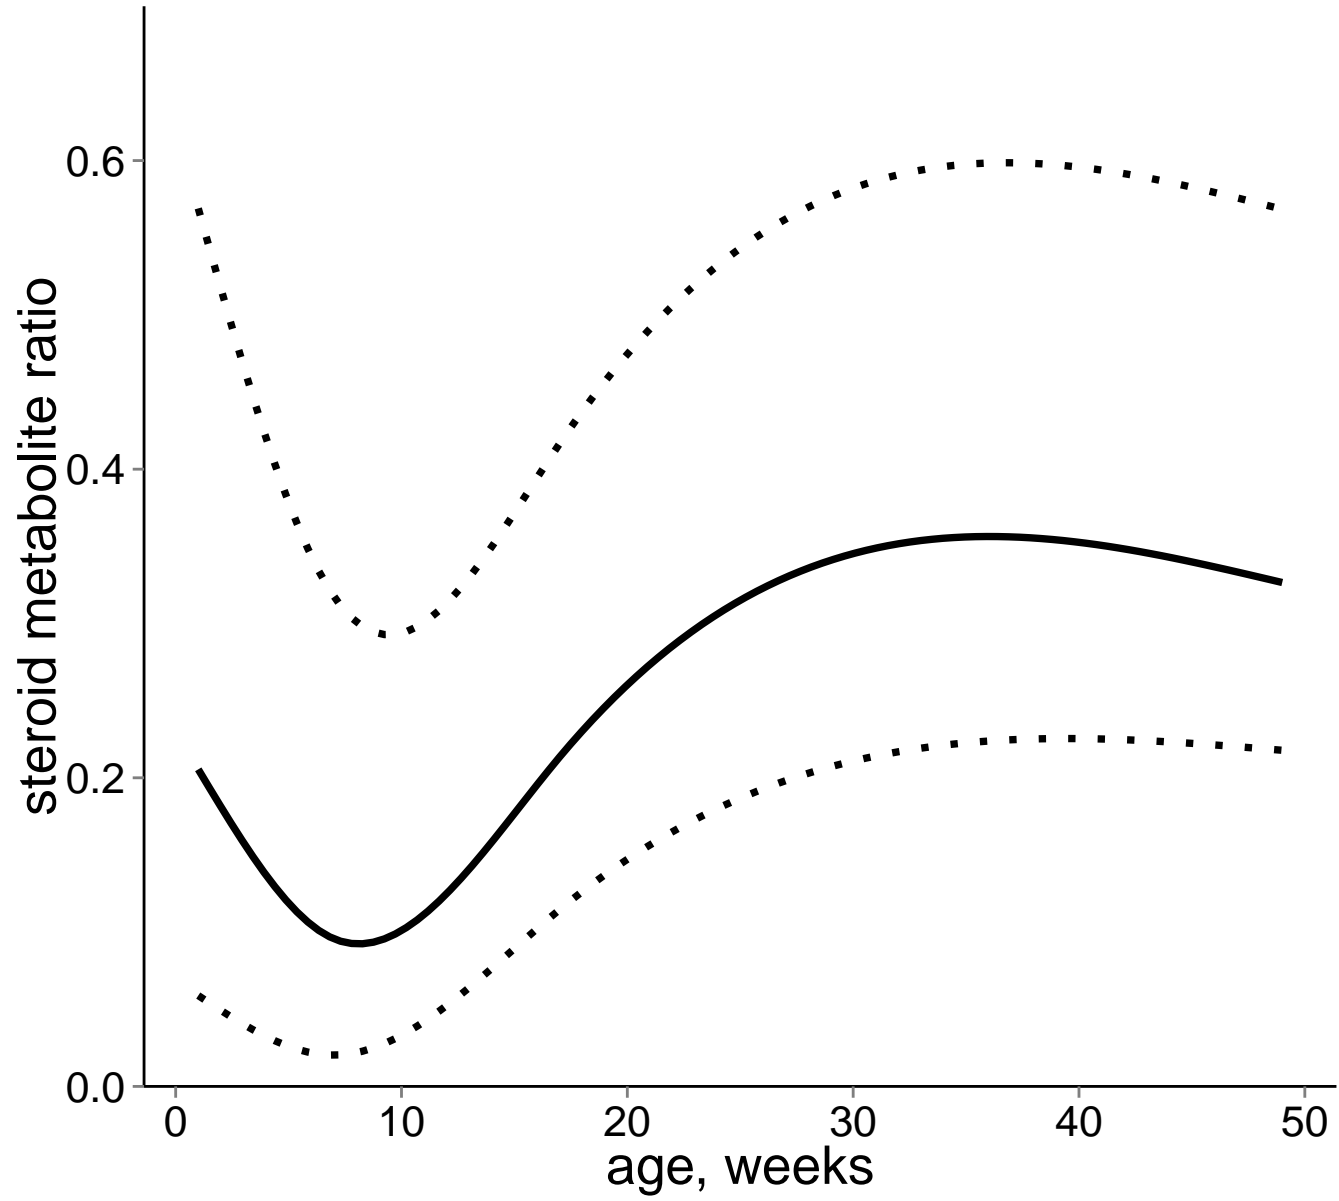

# 17 $\alpha$ -hydroxylase

## THA+THB+5 $\alpha$ THB/6OH-THE [23]

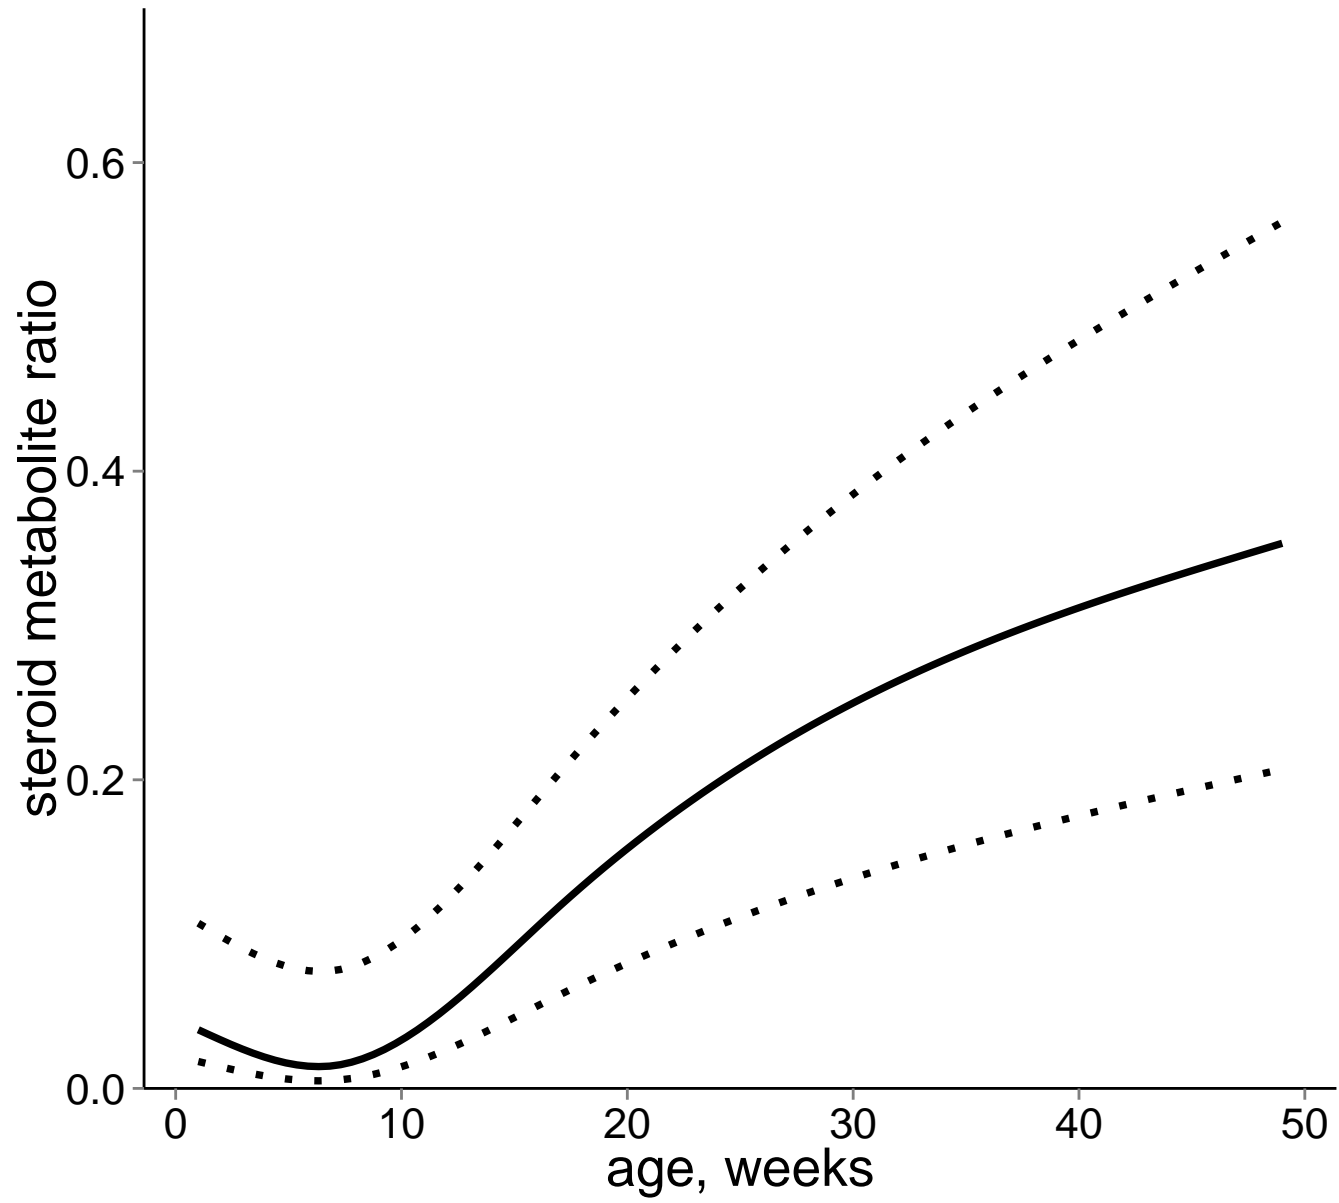

# 17 $\alpha$ -hydroxylase

THA+THB+5 $\alpha$ THB/(THE+6OH-THE) [24]

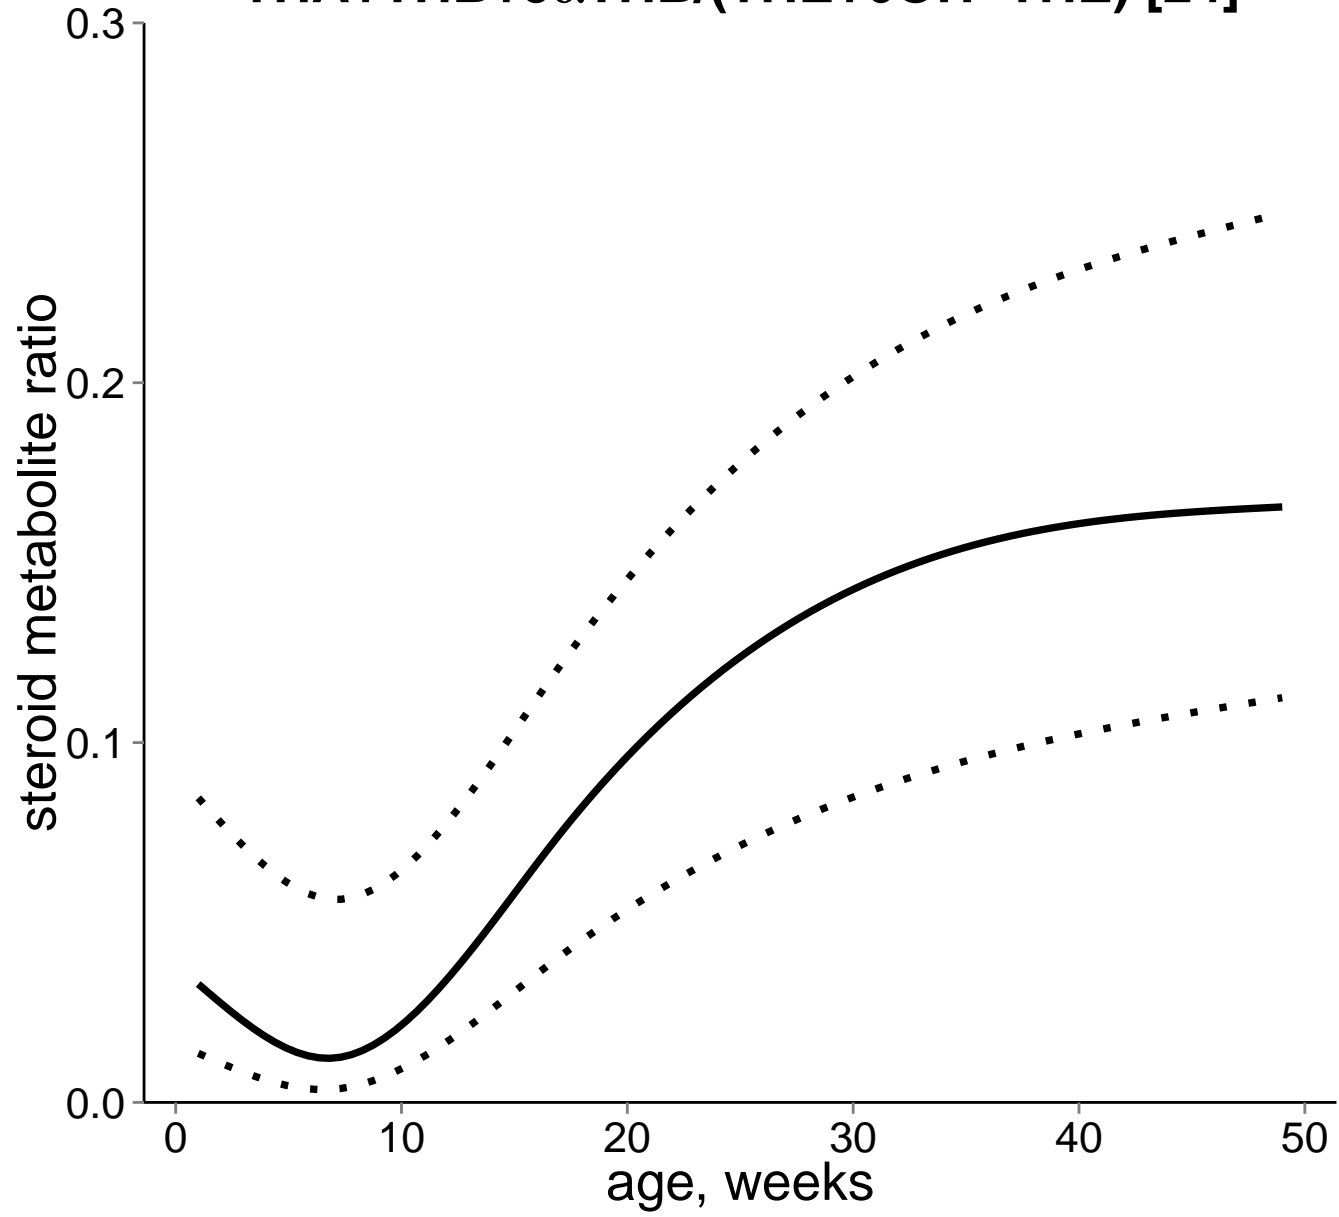

**$17\alpha$ -hydroxylase: THA+THB+  
 $5\alpha$ THB/(THE+6OH-THE+6OH- $\beta$ -CI) [25]**

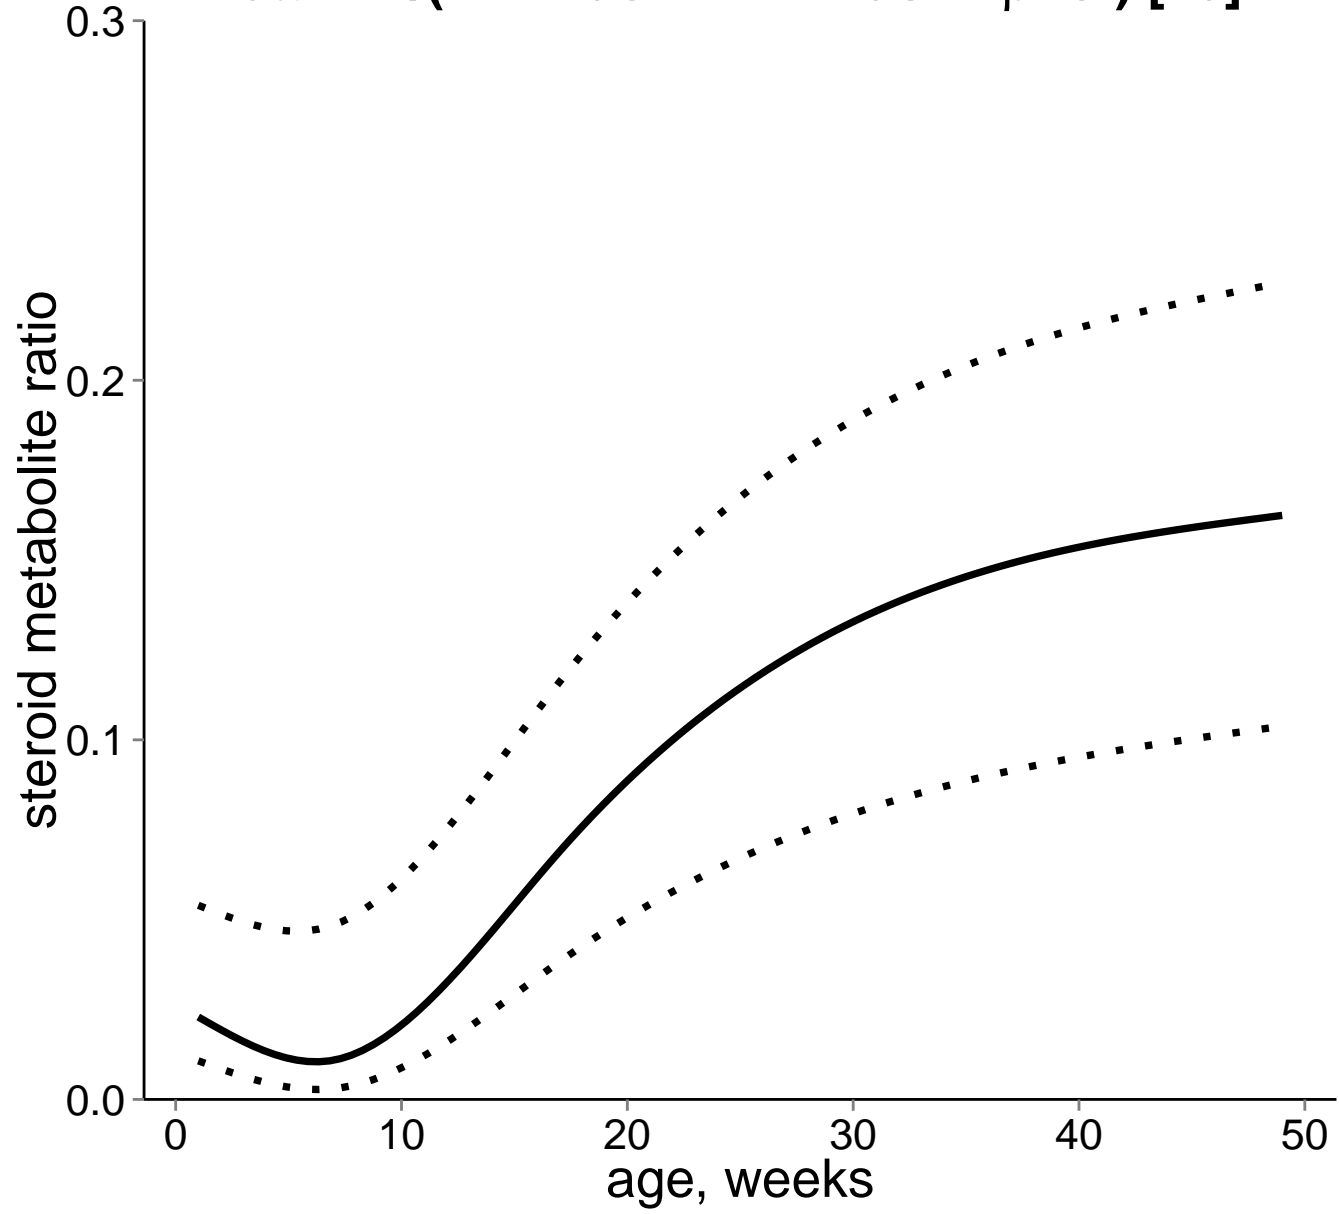

# 17 $\alpha$ -hydroxylase THA+THB+5 $\alpha$ THB/(AT+ET) [26]

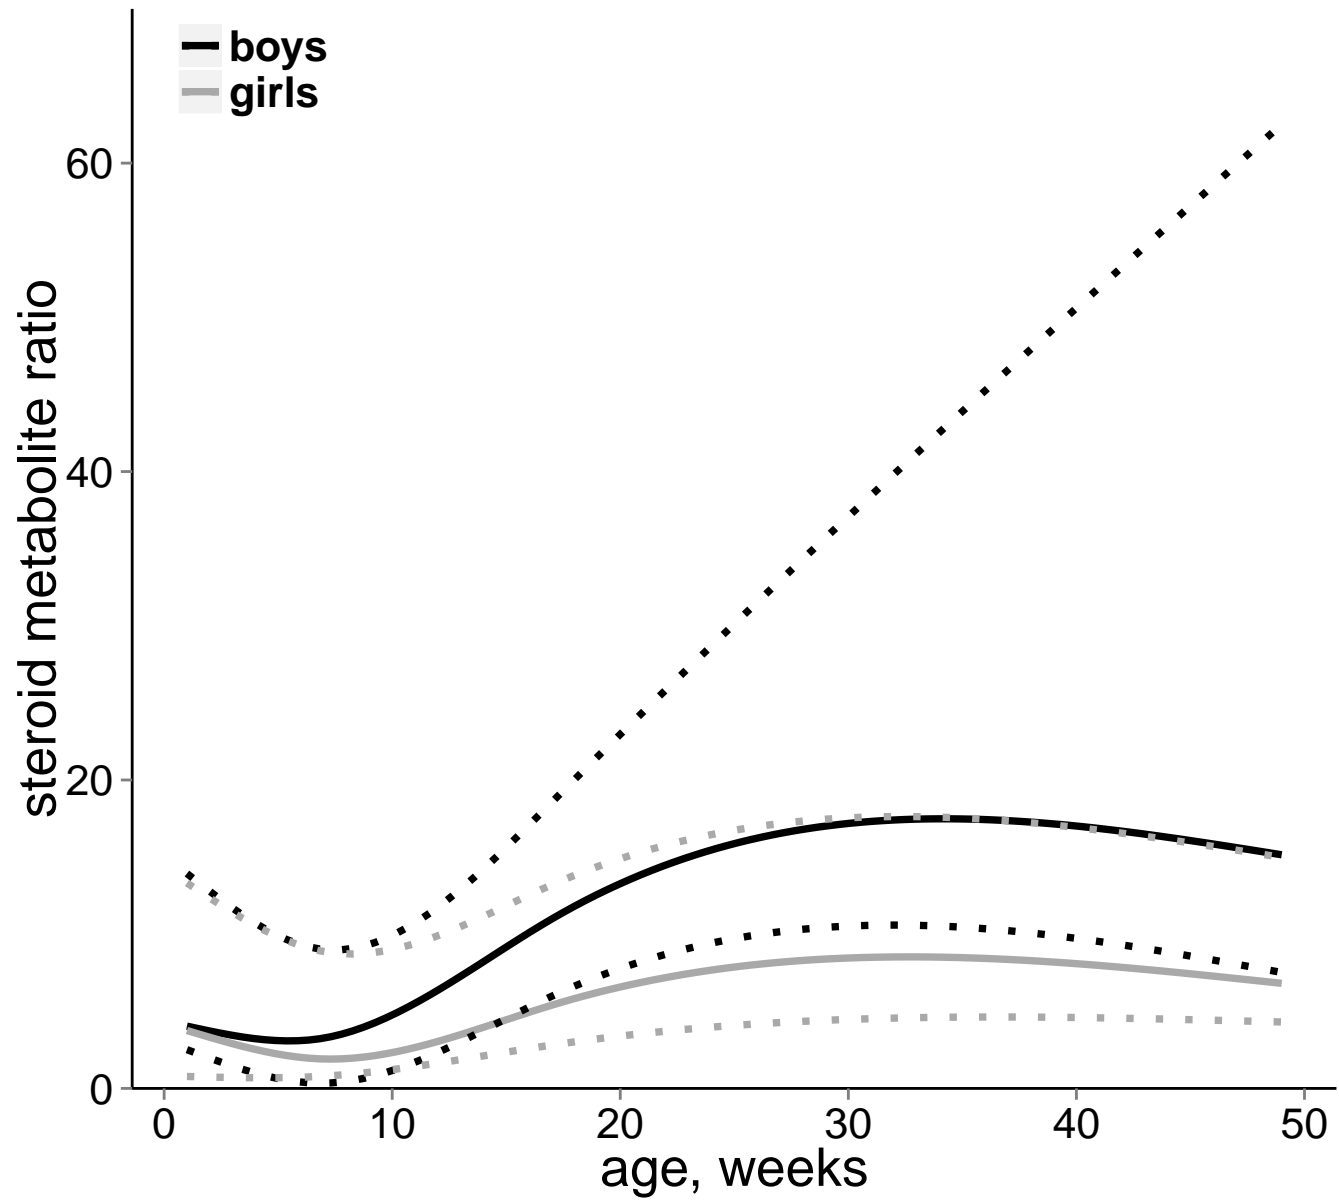

**P450 oxidoreductase  
(17HP+PT)/(AT+ET) [27]**

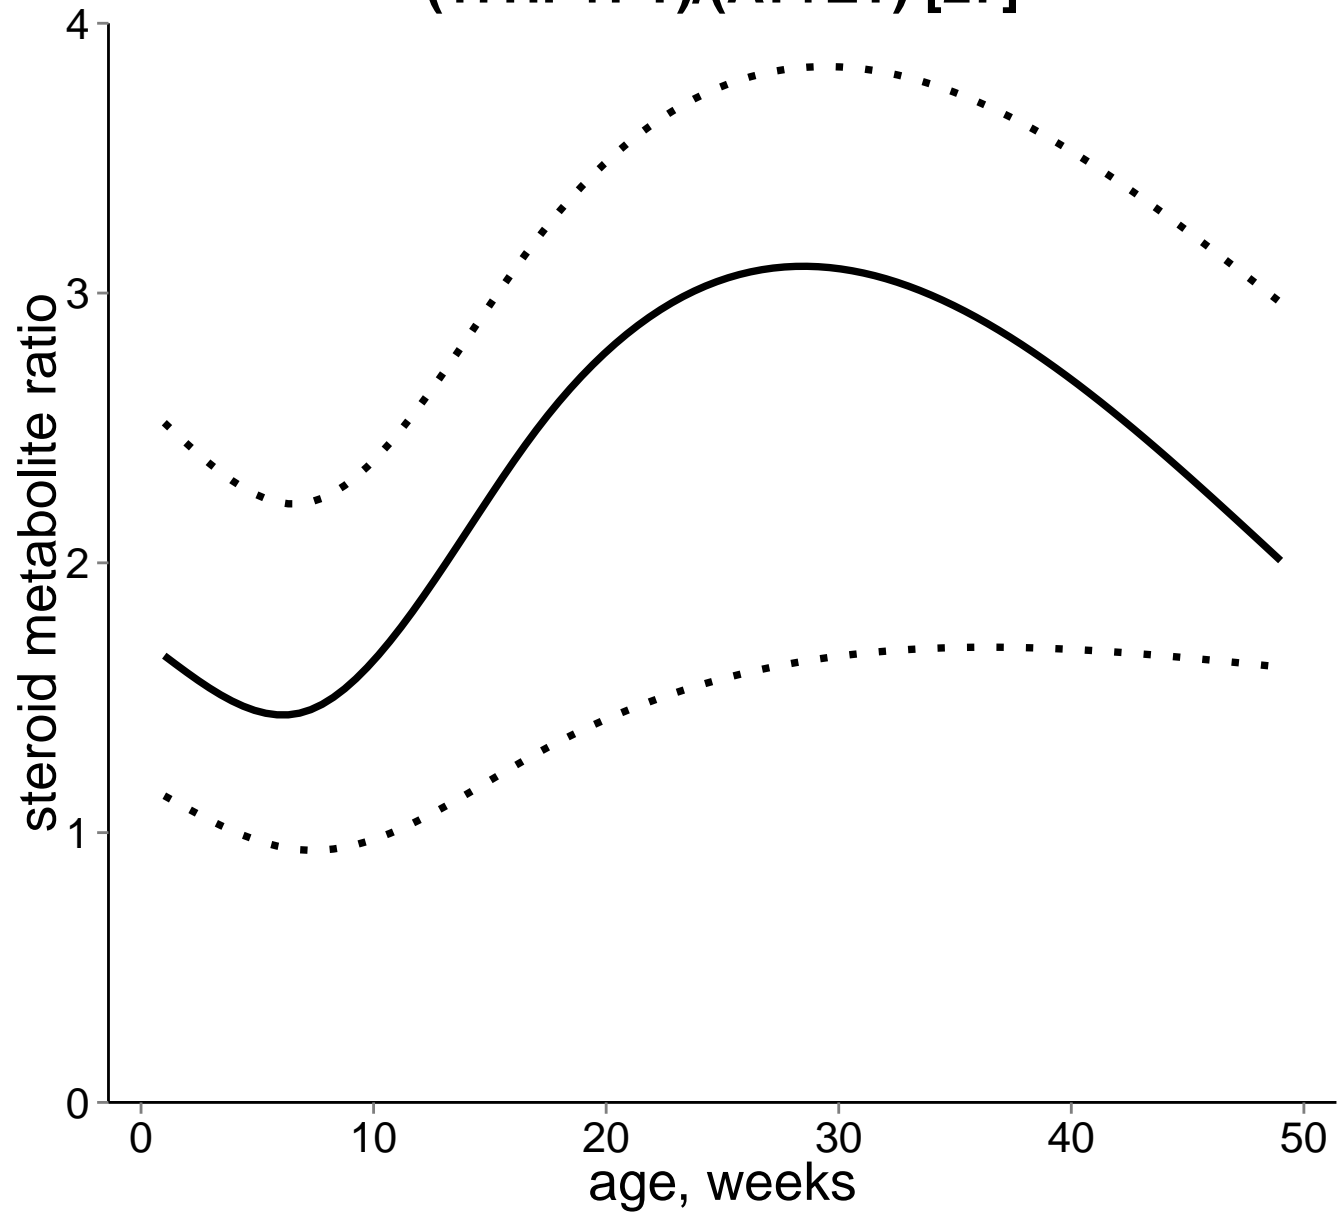

# P450 oxidoreductase (17HP+PT)/THE [28]

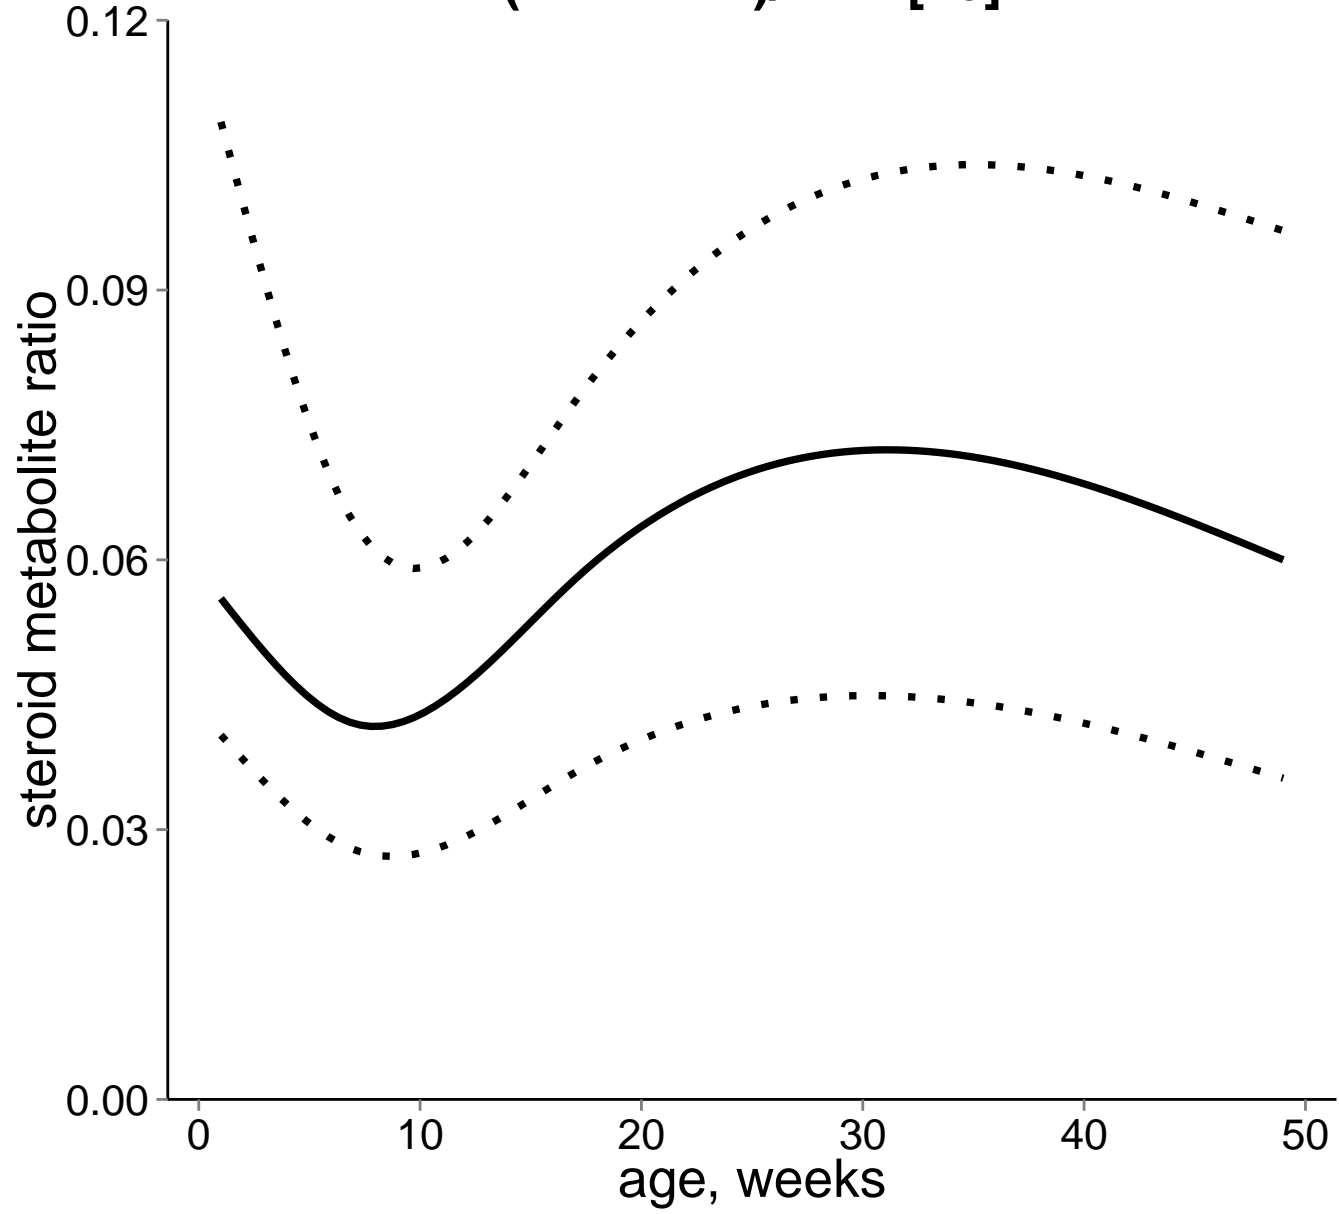



# P450 oxidoreductase (17HP+PT)/6OH-THE [29]

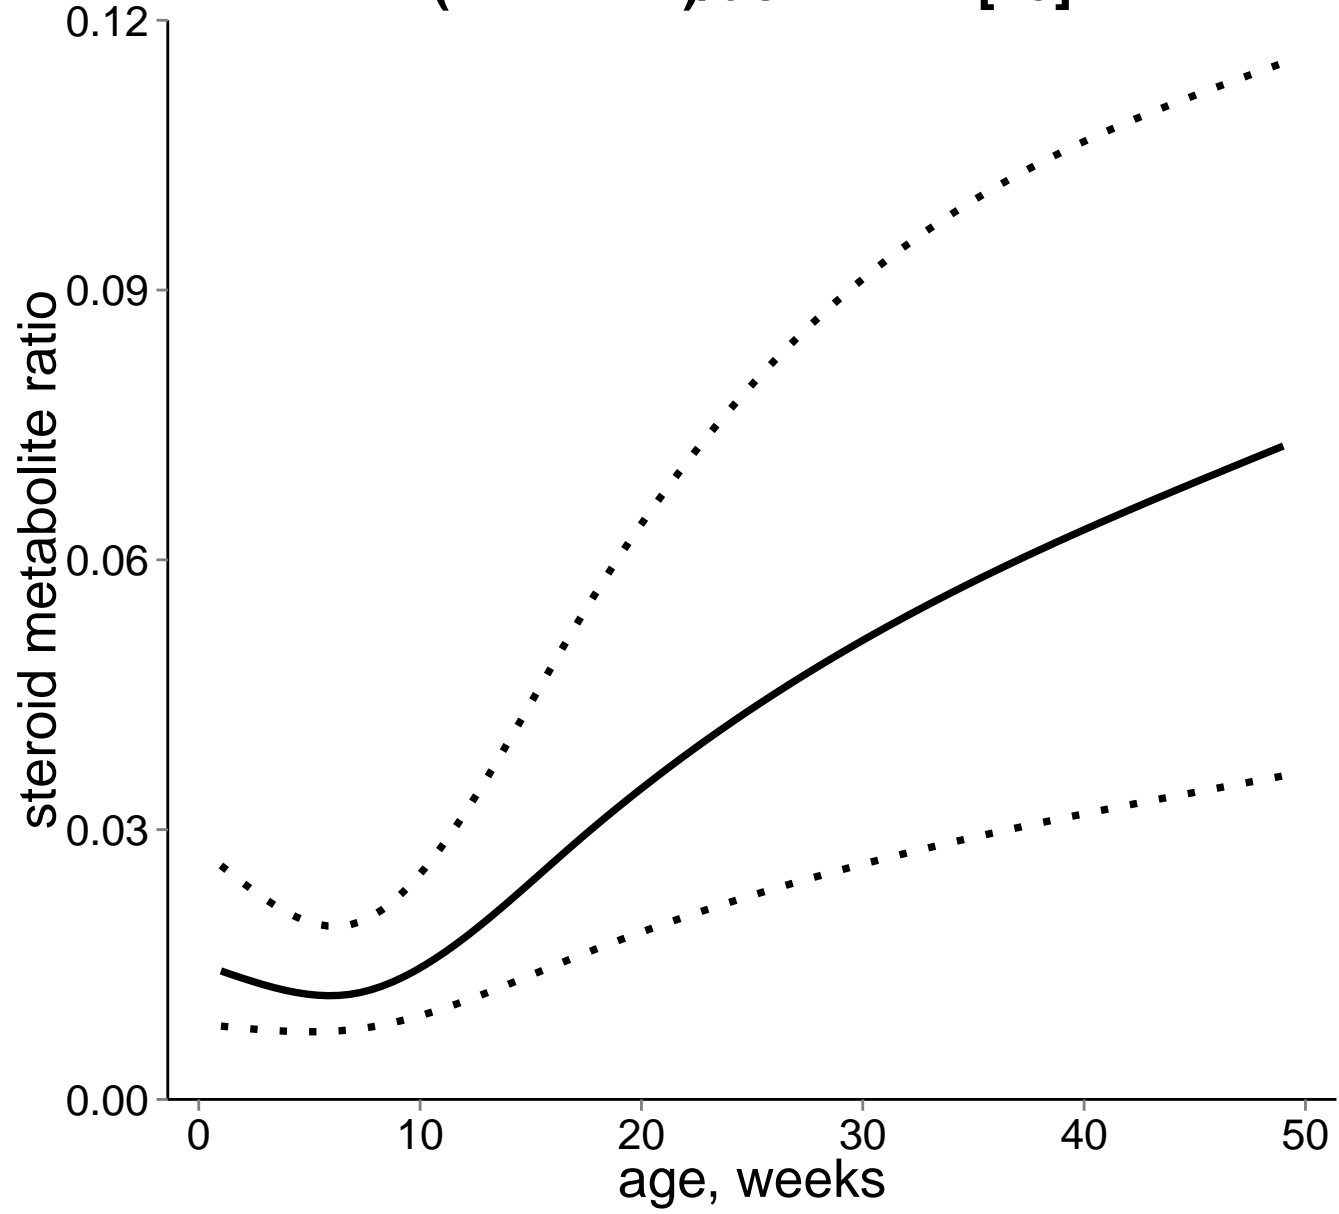

**P450 oxidoreductase  
(17HP+PT)/(THE+6OH-THE) [30]**

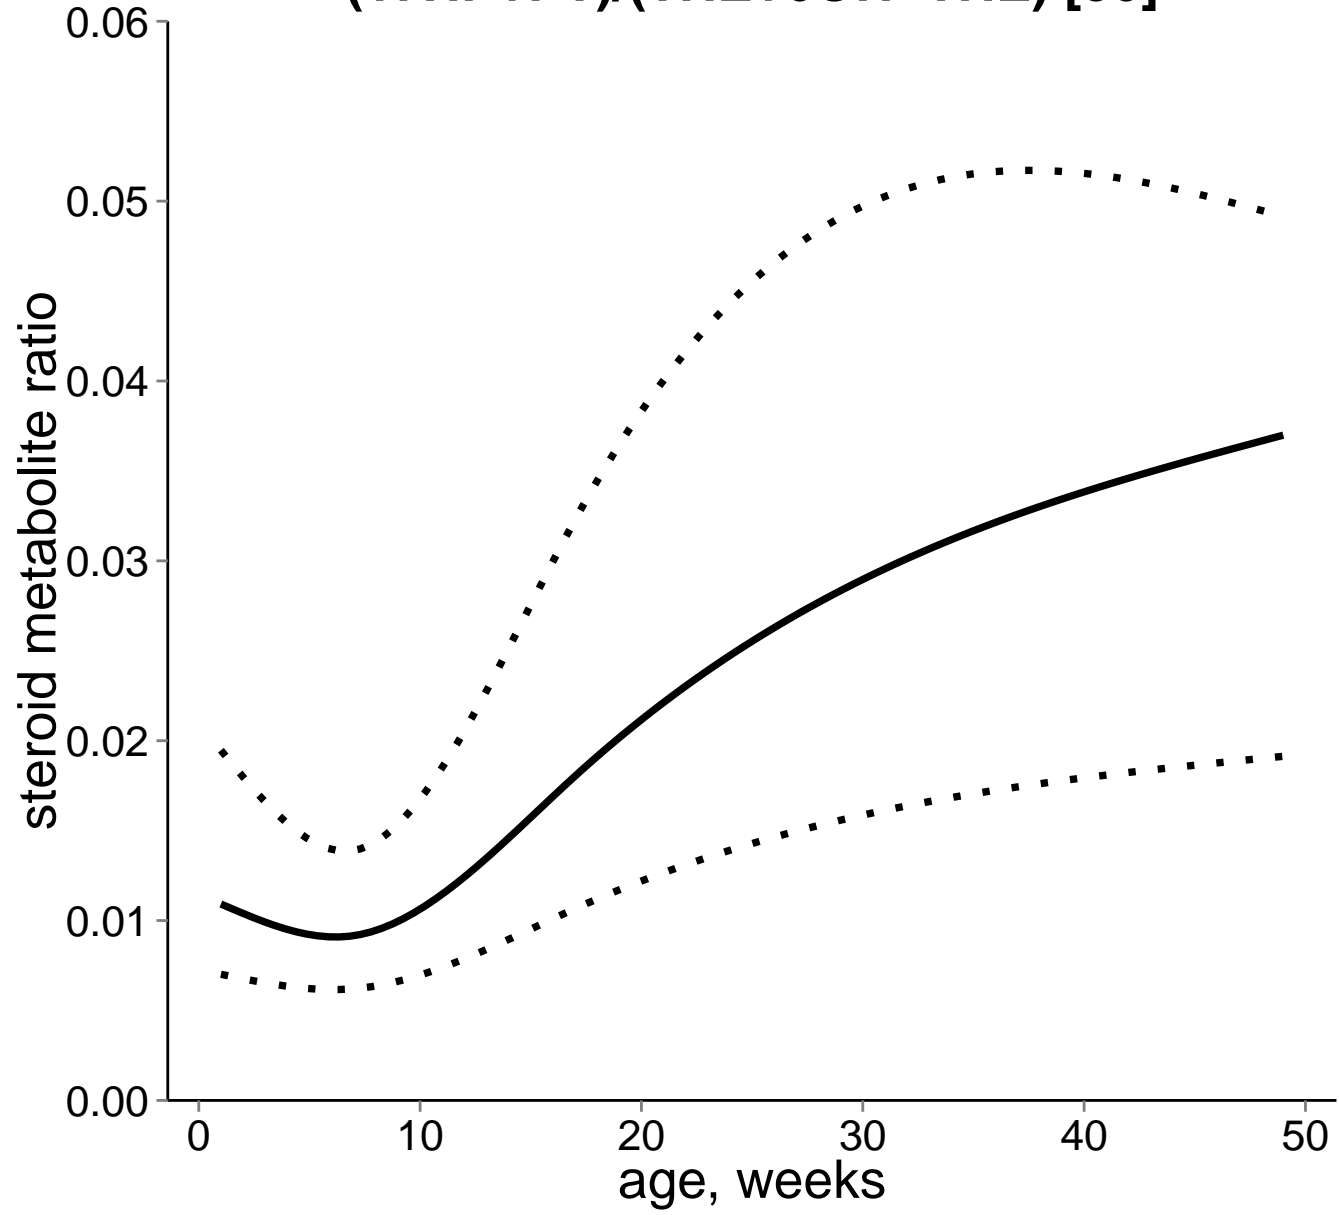

# P450 oxidoreductase (17HP+PT)/(THE+6OH-THE+6OH-β-CI) [31]

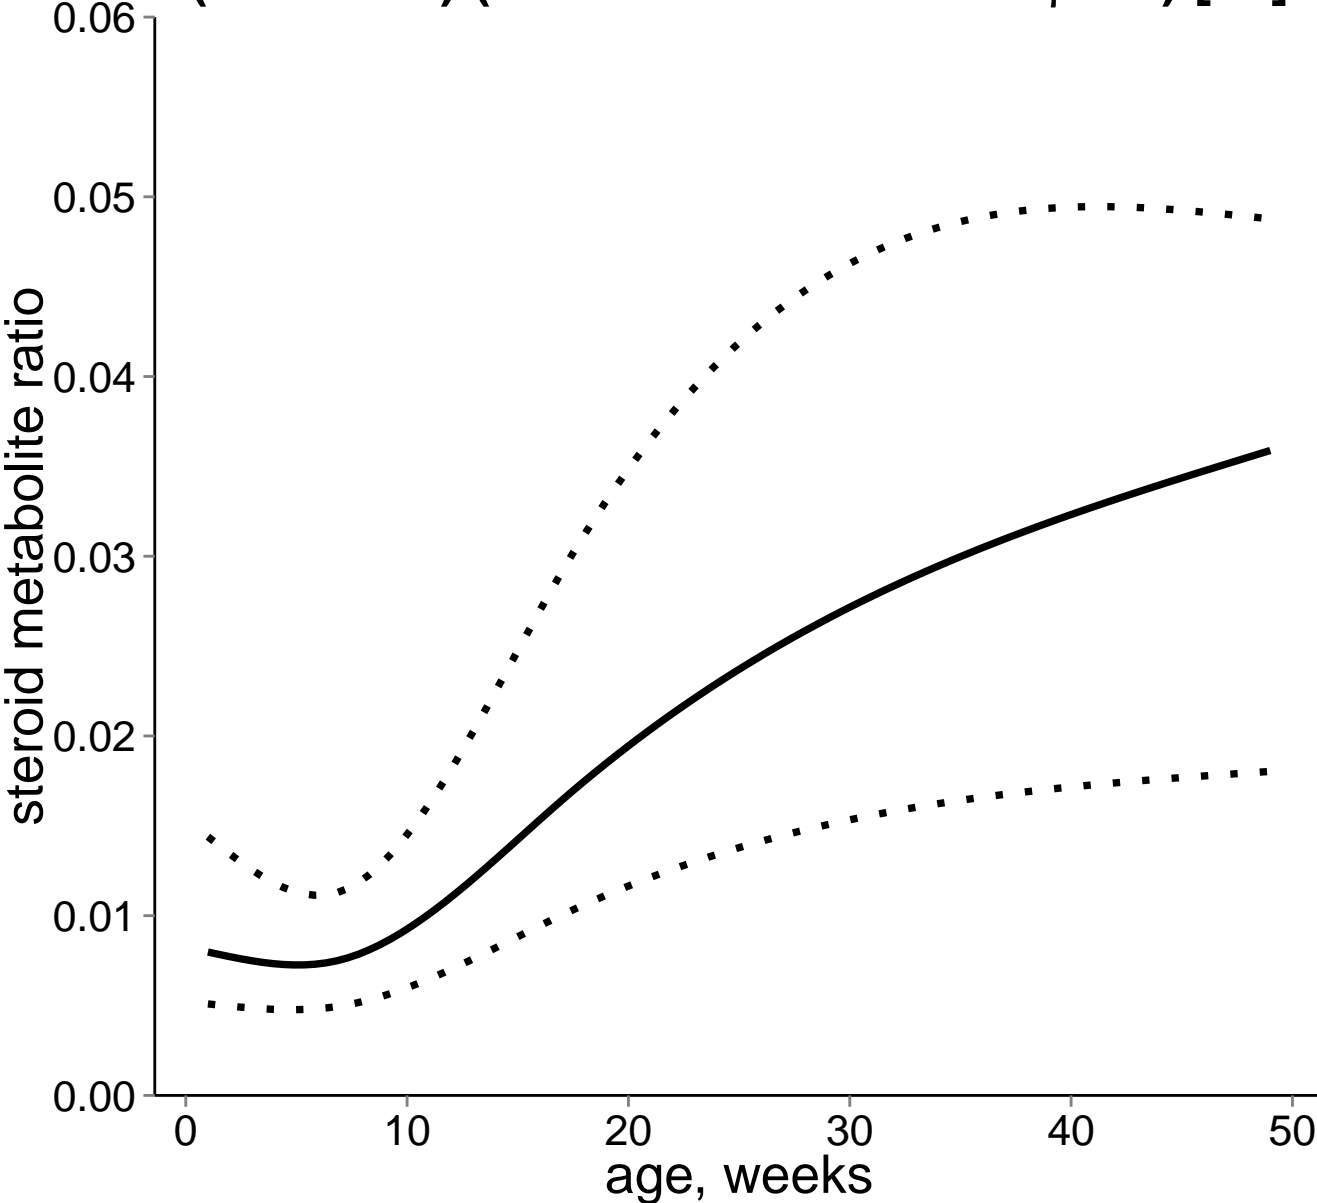

# P450 oxidoreductase PD/THE [32]

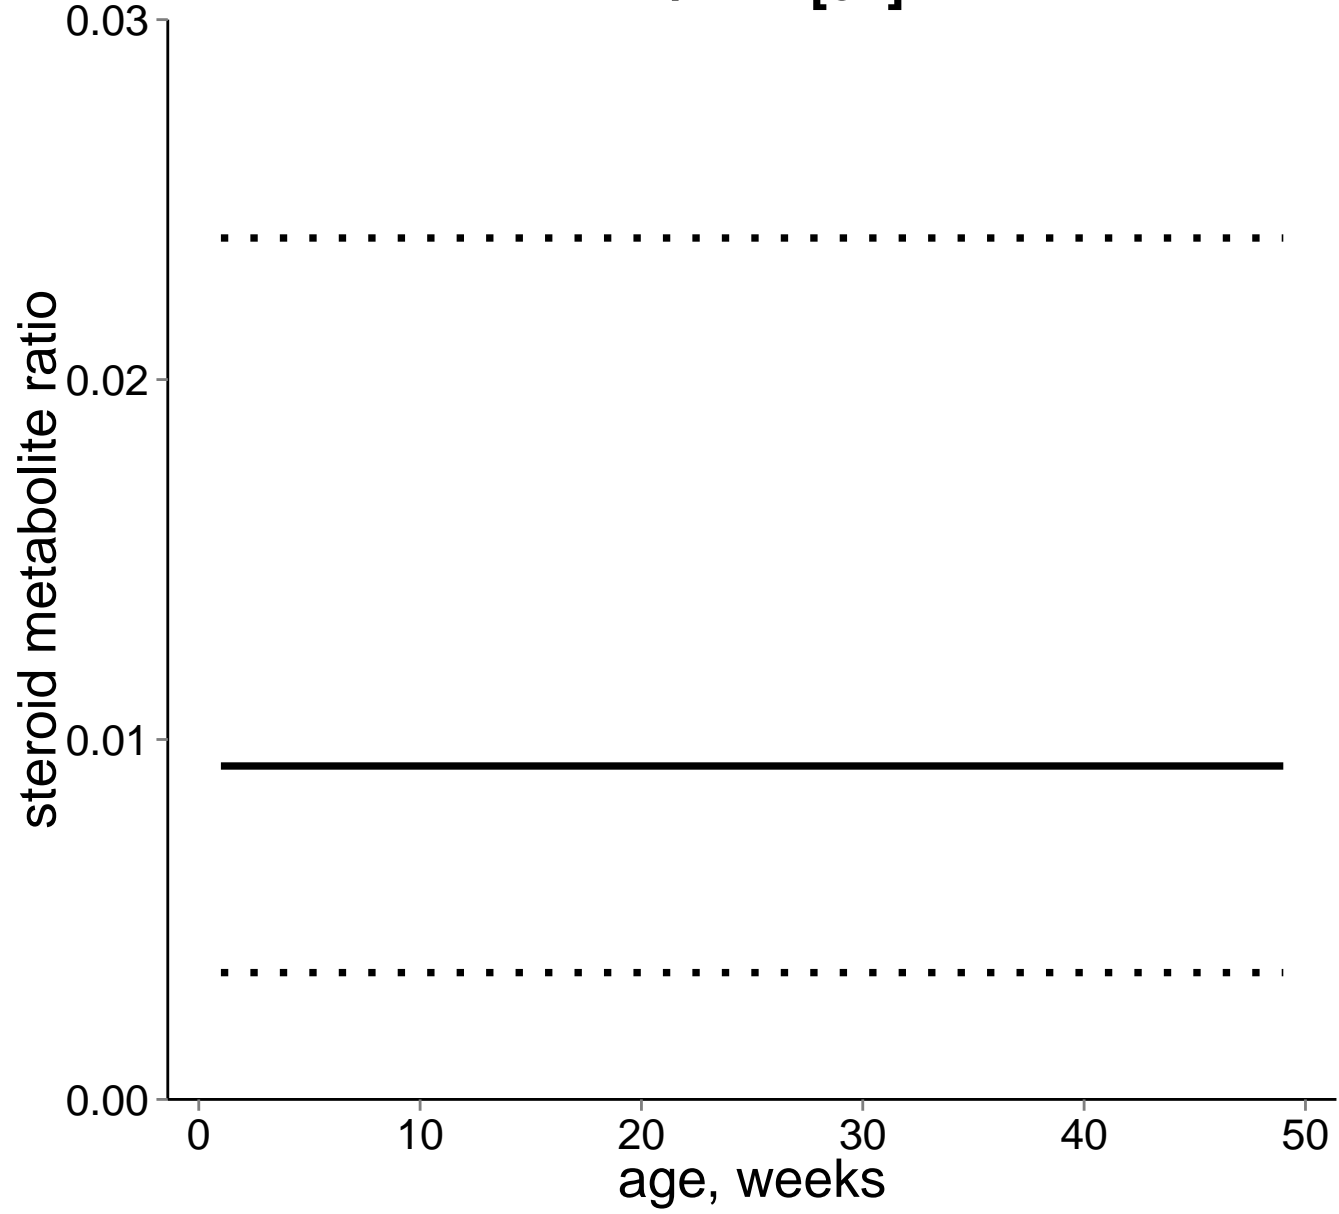

# P450 oxidoreductase PD/6OH-THE [33]

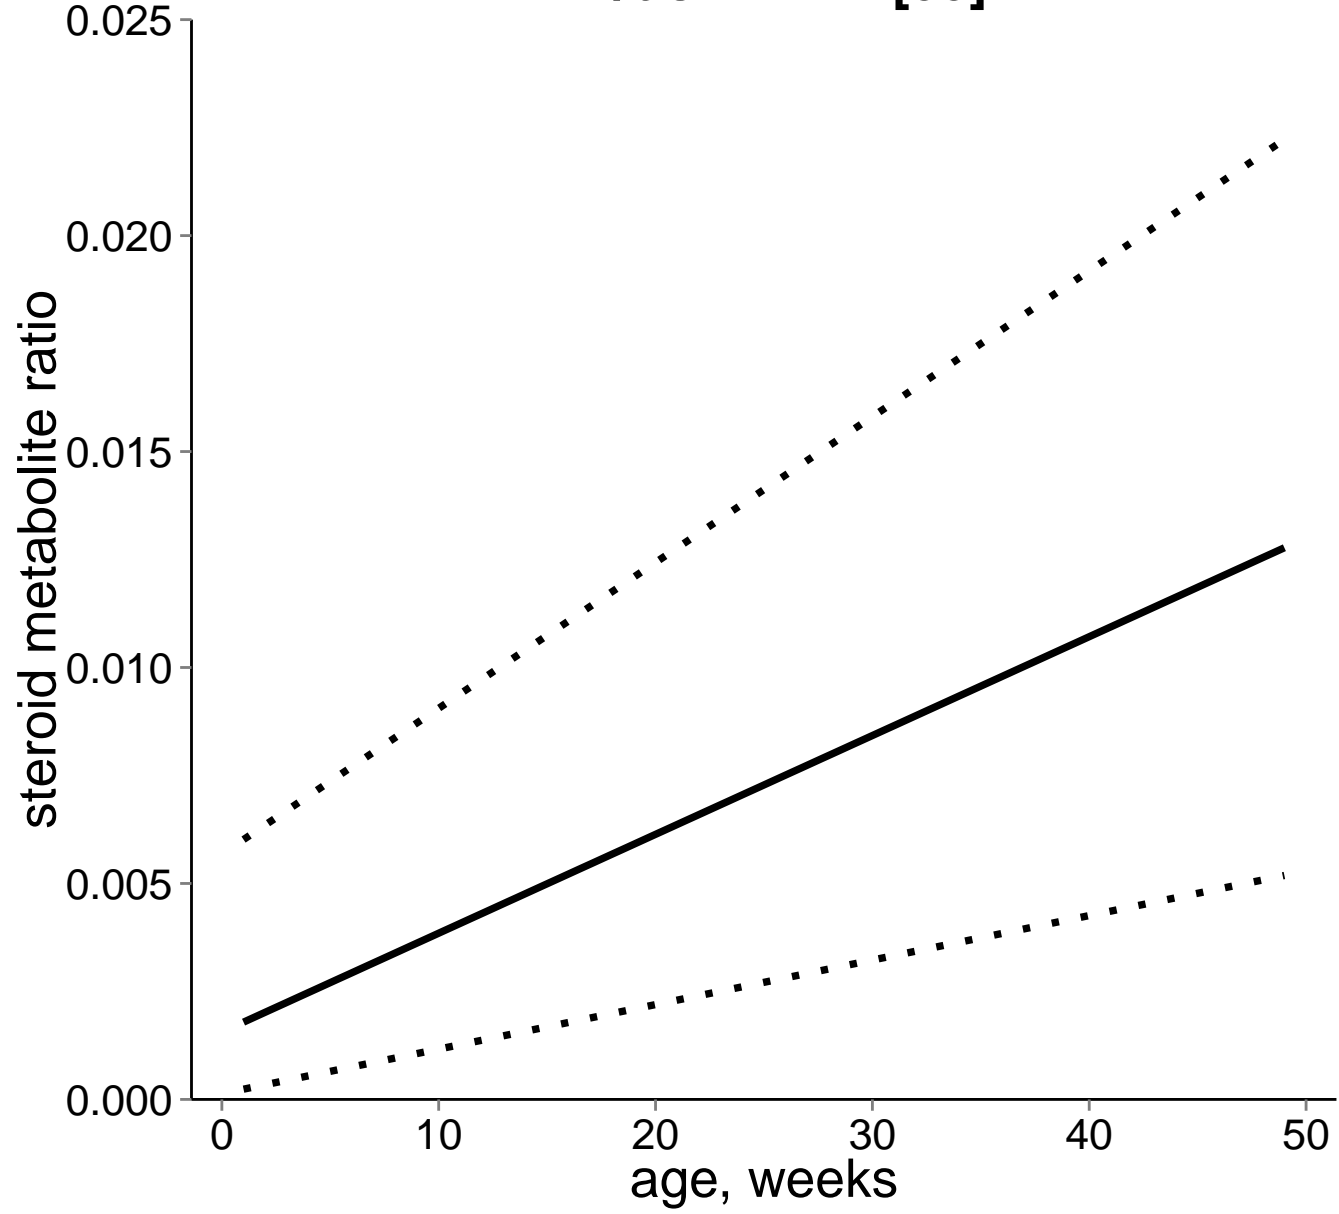

# P450 oxidoreductase PD/(THE+6OH-THE) [34]

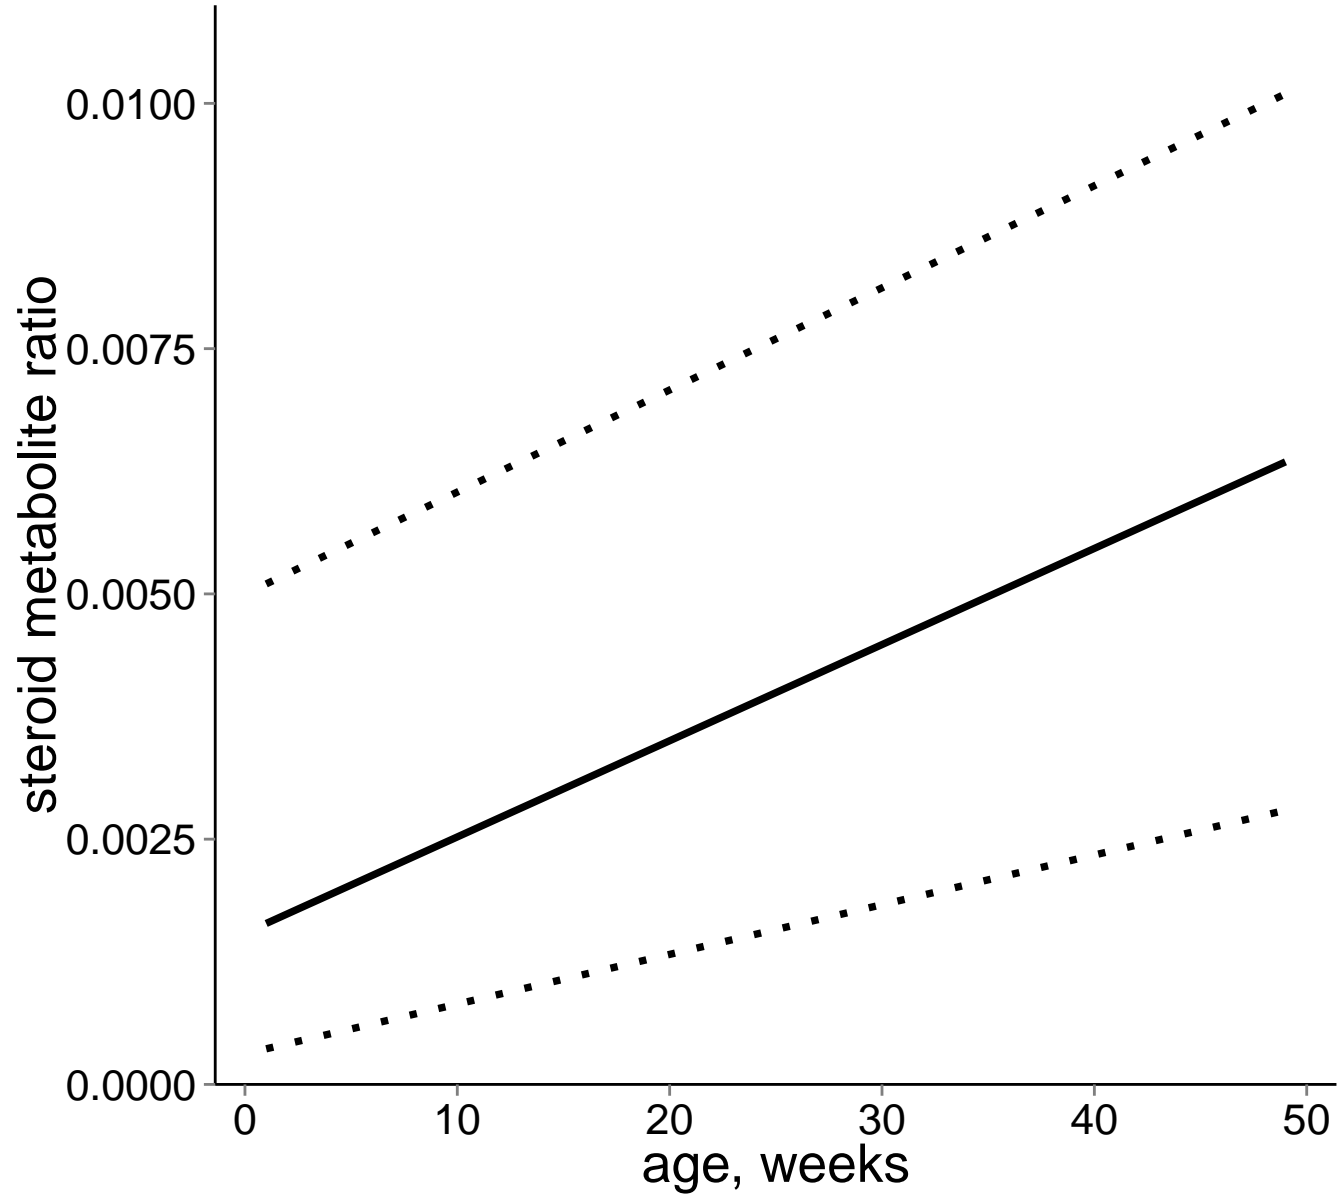

**P450 oxidoreductase**  
**PD/(THE+6OH-THE+6OH-β-CI) [35]**

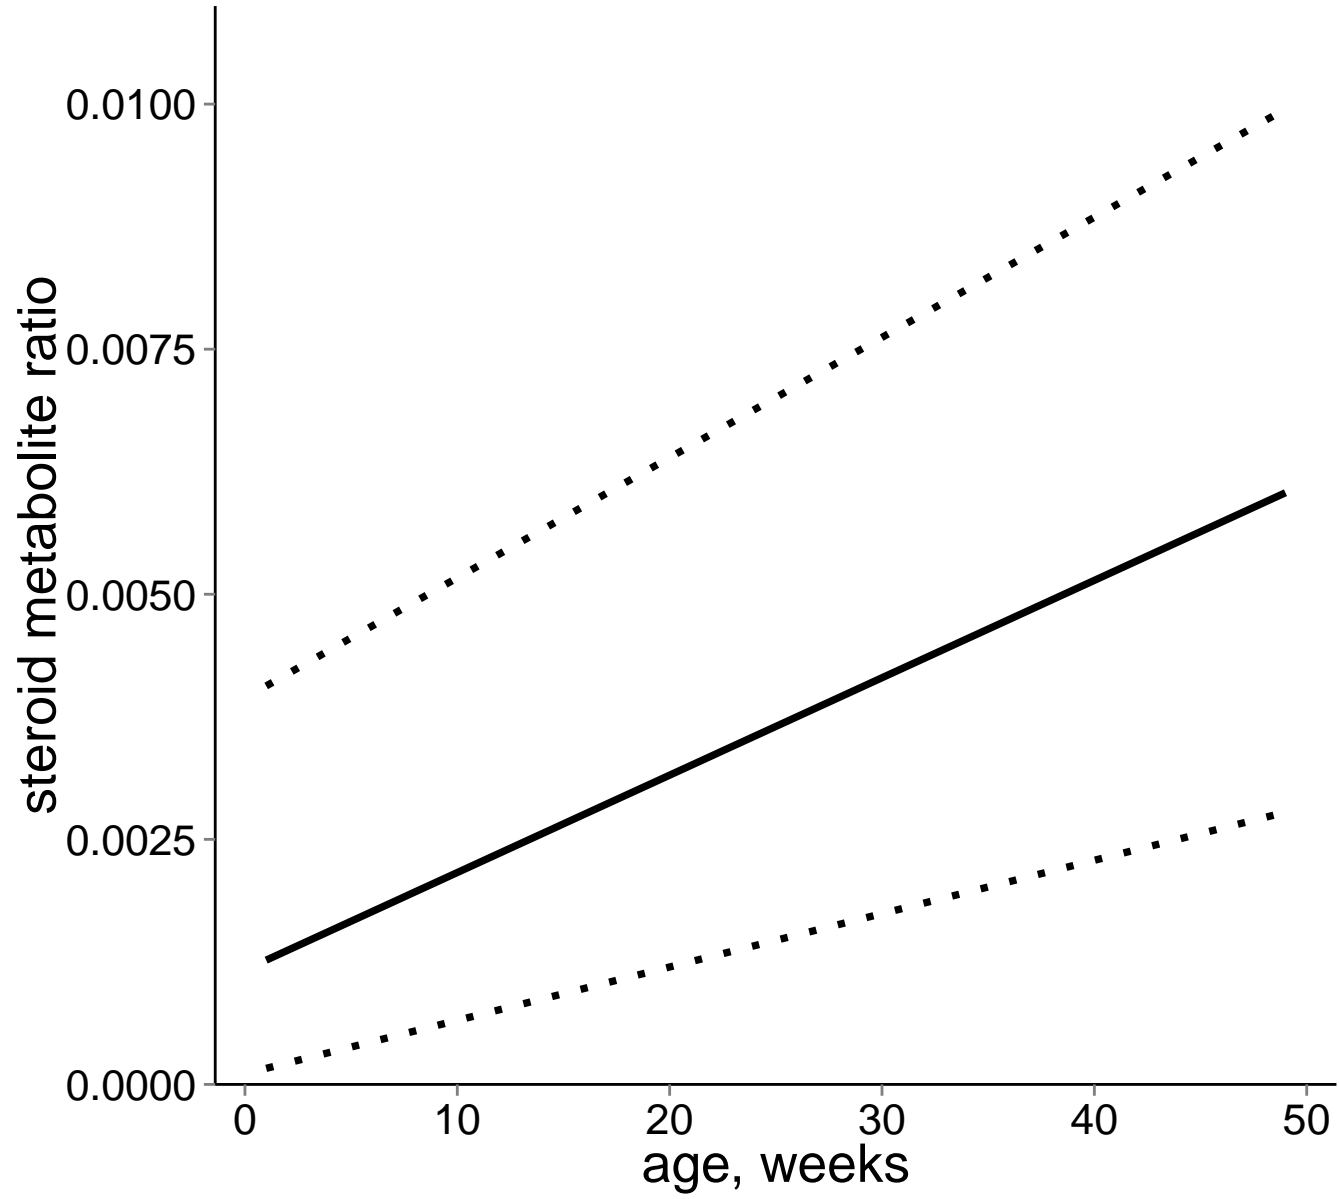

# 11 $\beta$ -HSD type 2 F/E [36]

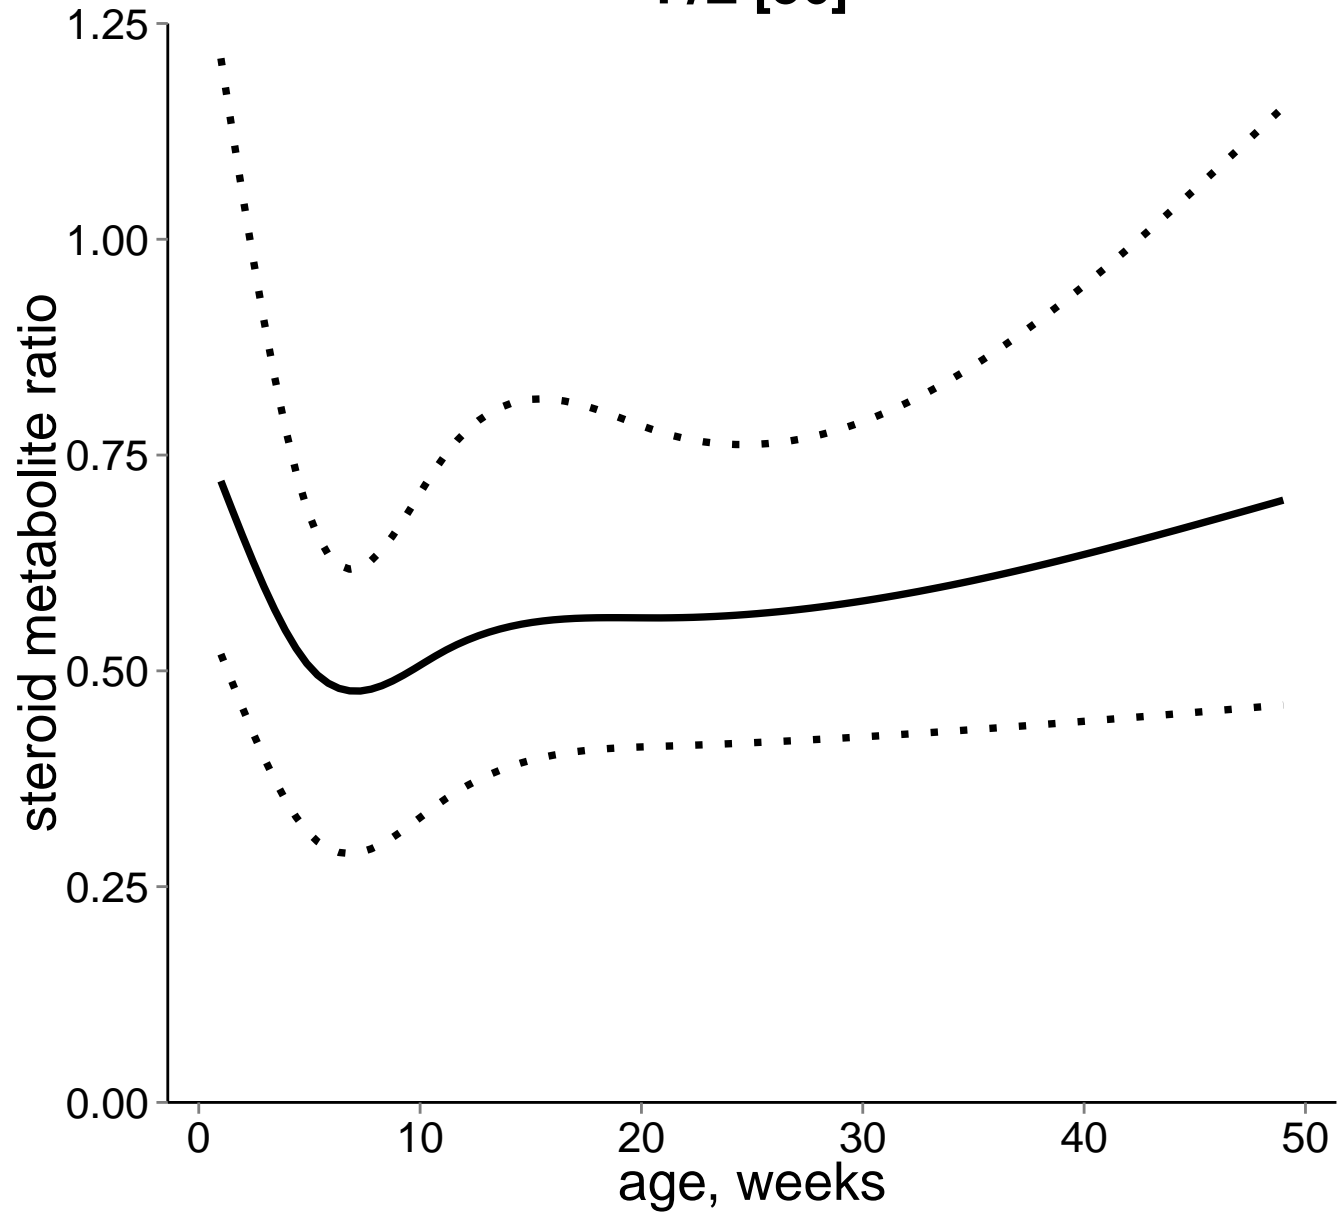



# 11 $\beta$ -HSD type 2 (THF+5 $\alpha$ THF)/THE [37]

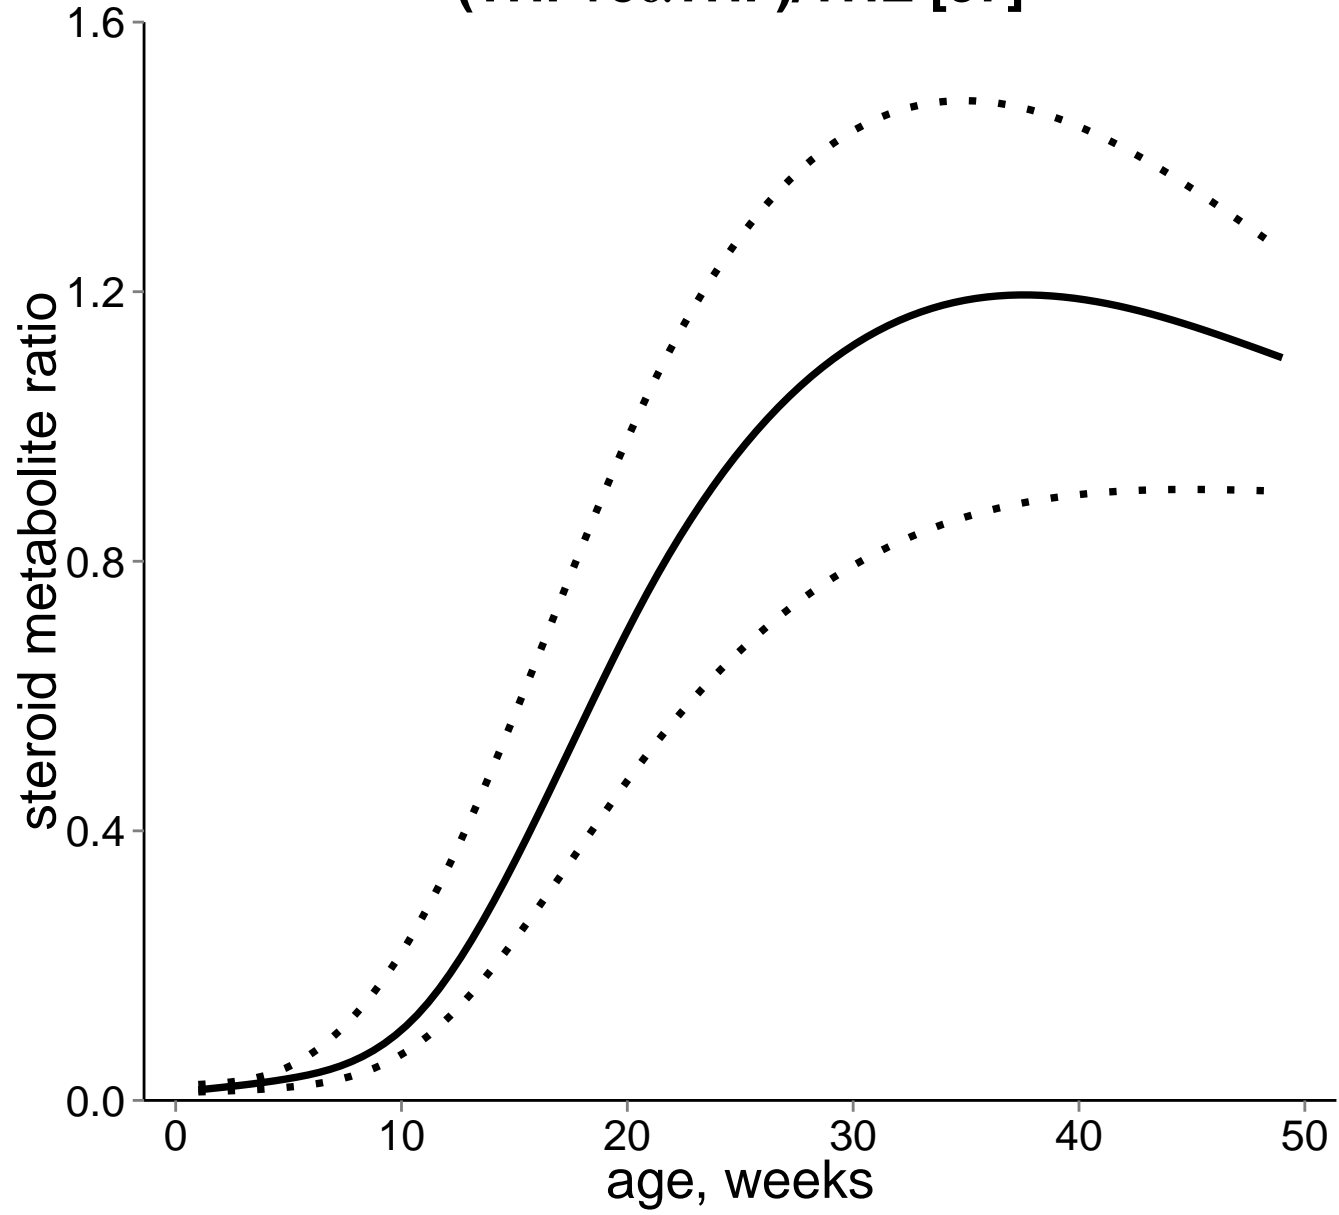

**11 $\beta$ -HSD type 2**  
 **$(\alpha\text{-C}+\beta\text{-C})/(\alpha\text{-CI}+\beta\text{-CI})$  [38]**

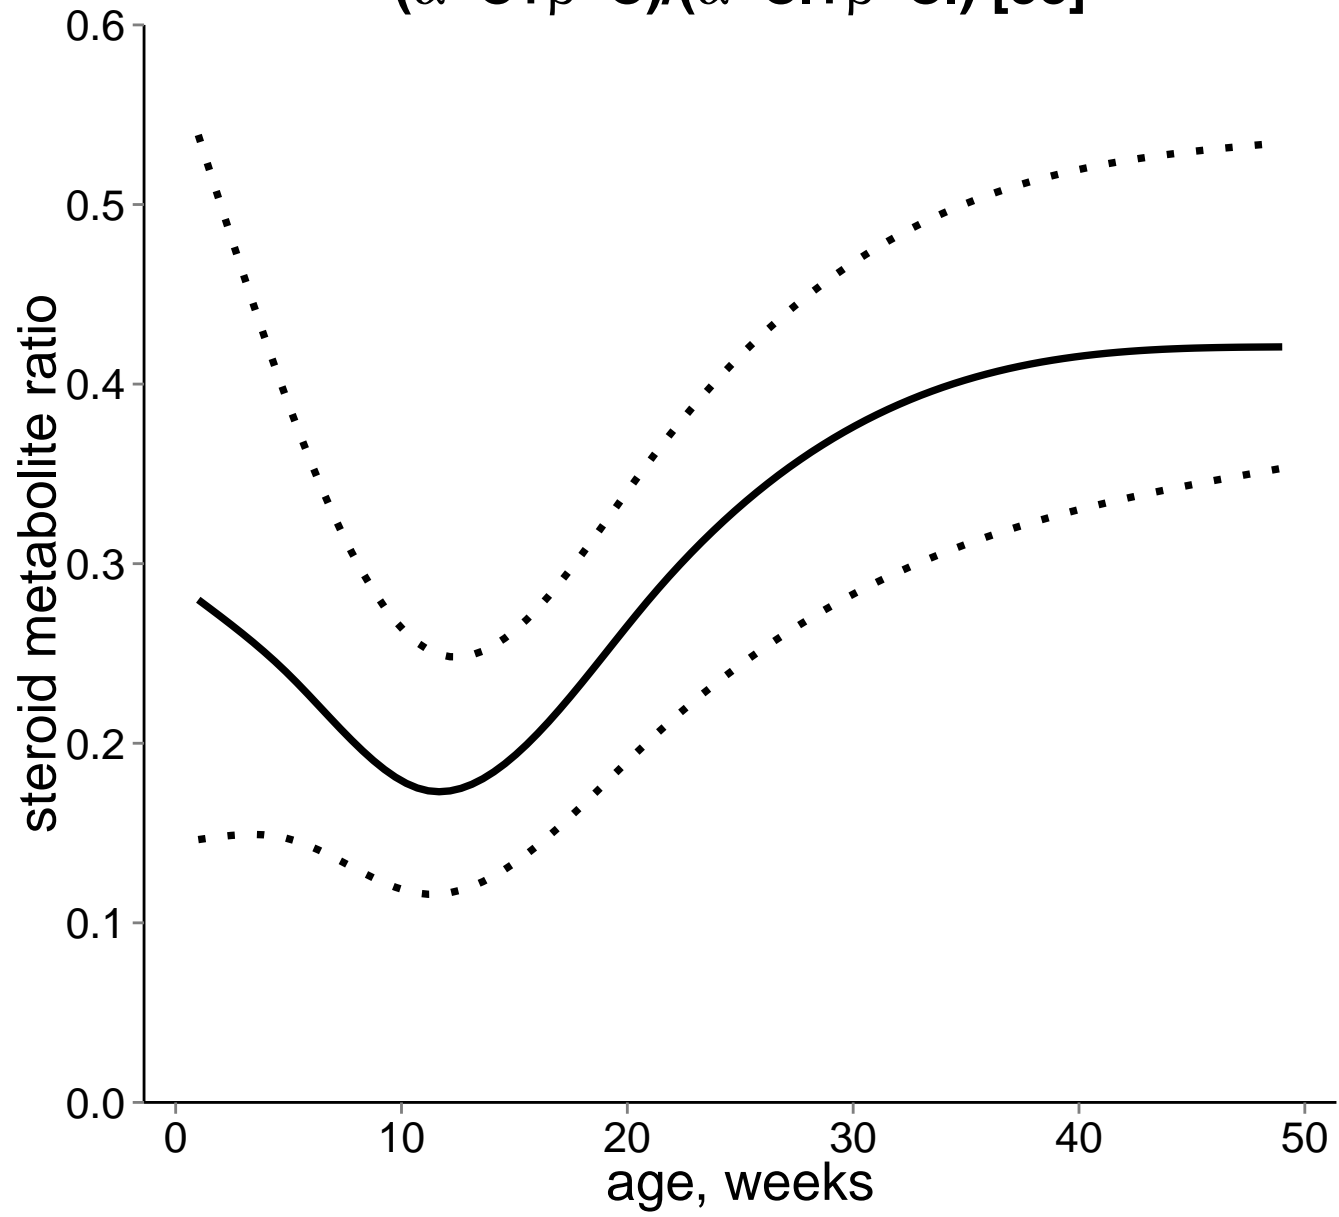

**11 $\beta$ -HSD type 2: ( $\alpha$ C+ $\beta$ C)/  
( $\alpha$ CI+ $\beta$ CI+6OH $\alpha$ CI+1 $\beta$ OH $\beta$ CI+6OH $\beta$ CI) [39]**

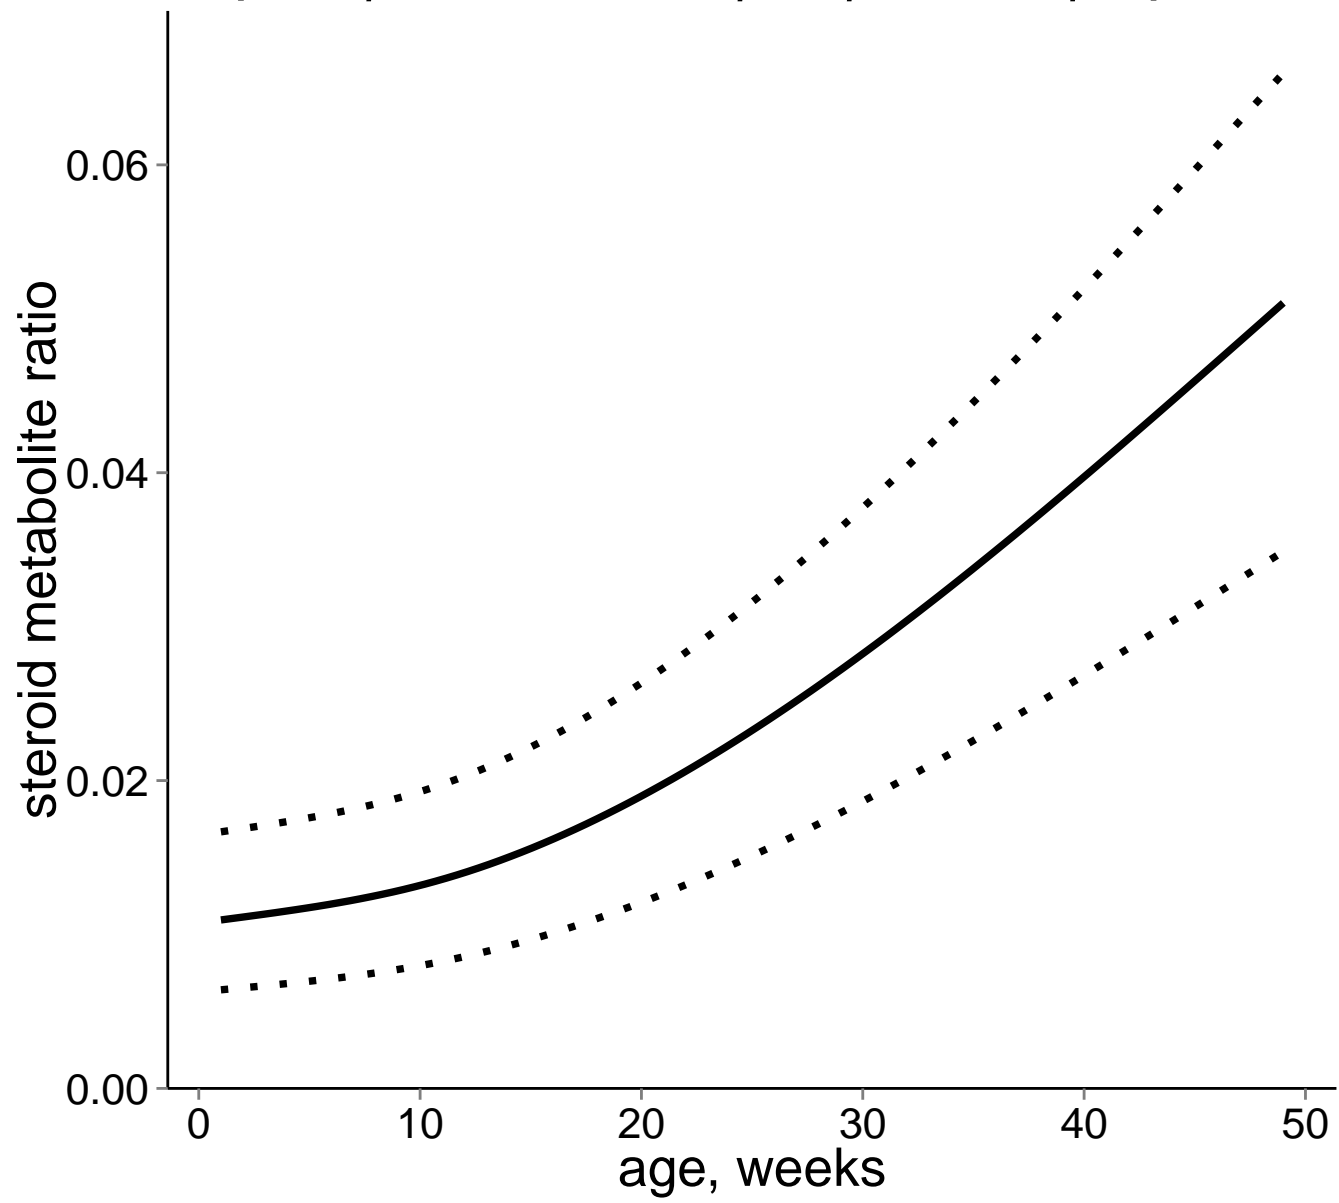

**11 $\beta$ -HSD type 2**  
**(F+E)/(THF+5 $\alpha$ THF+THE) [40]**

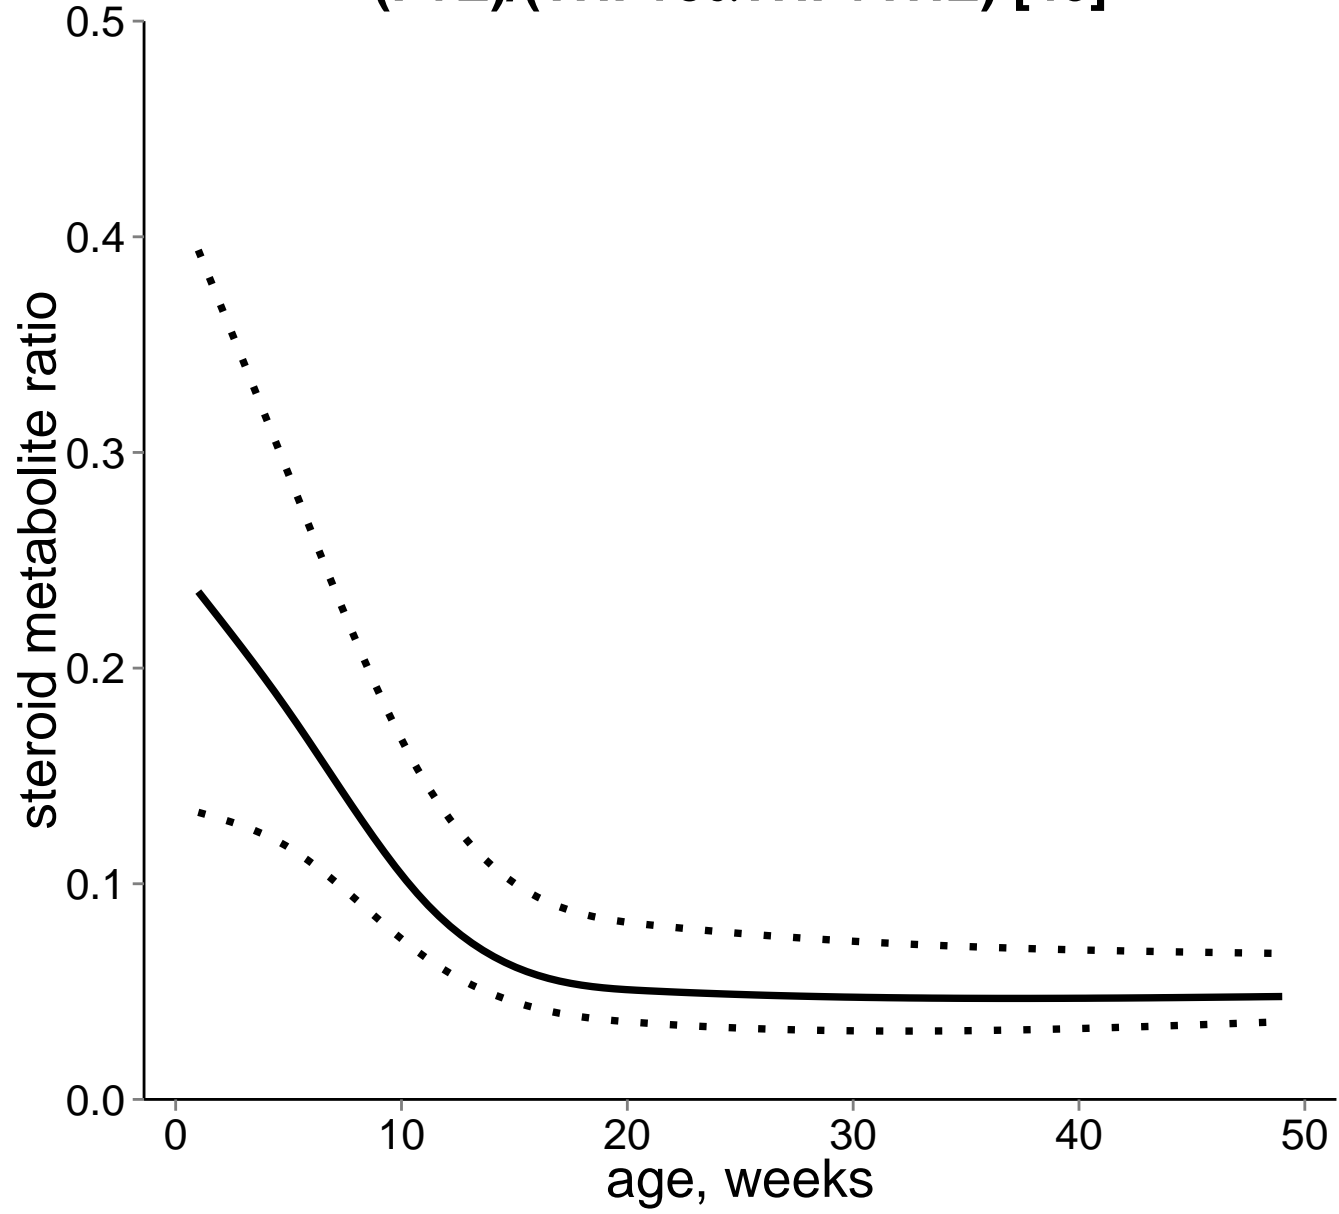

**11 $\beta$ -HSD type 1  
THE/(THF+5 $\alpha$ THF) [41]**

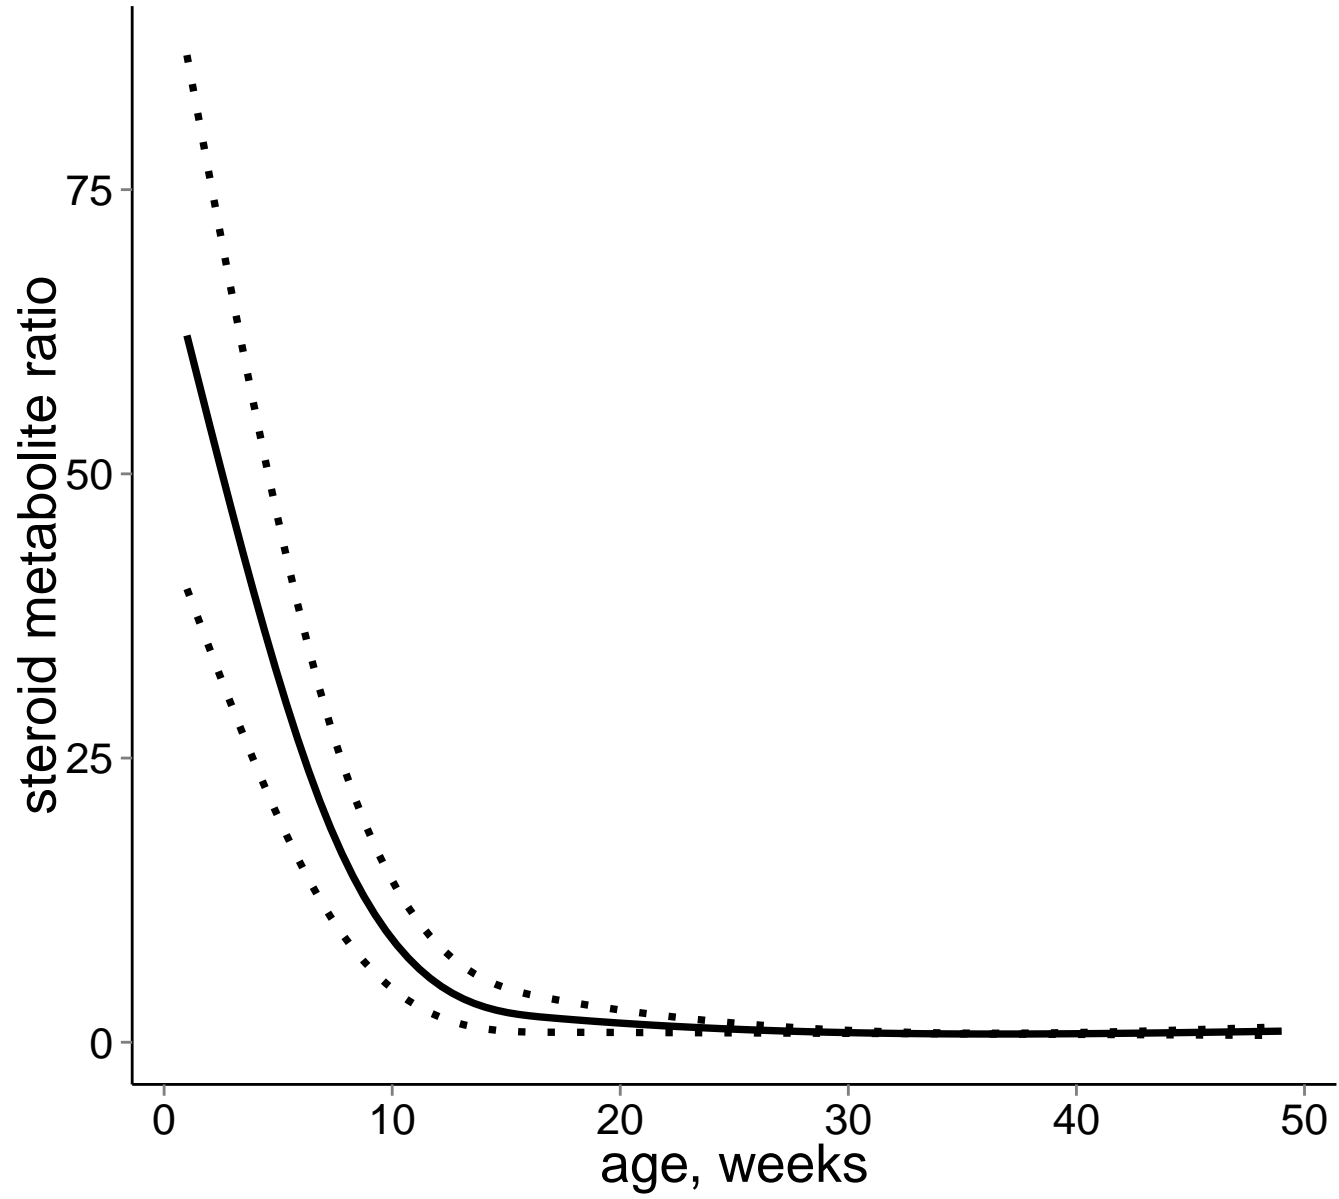

**11 $\beta$ -HSD type 1**  
 **$(\alpha\text{-CI}+\beta\text{-CI})/(\alpha\text{-C}+\beta\text{-C})$  [42]**

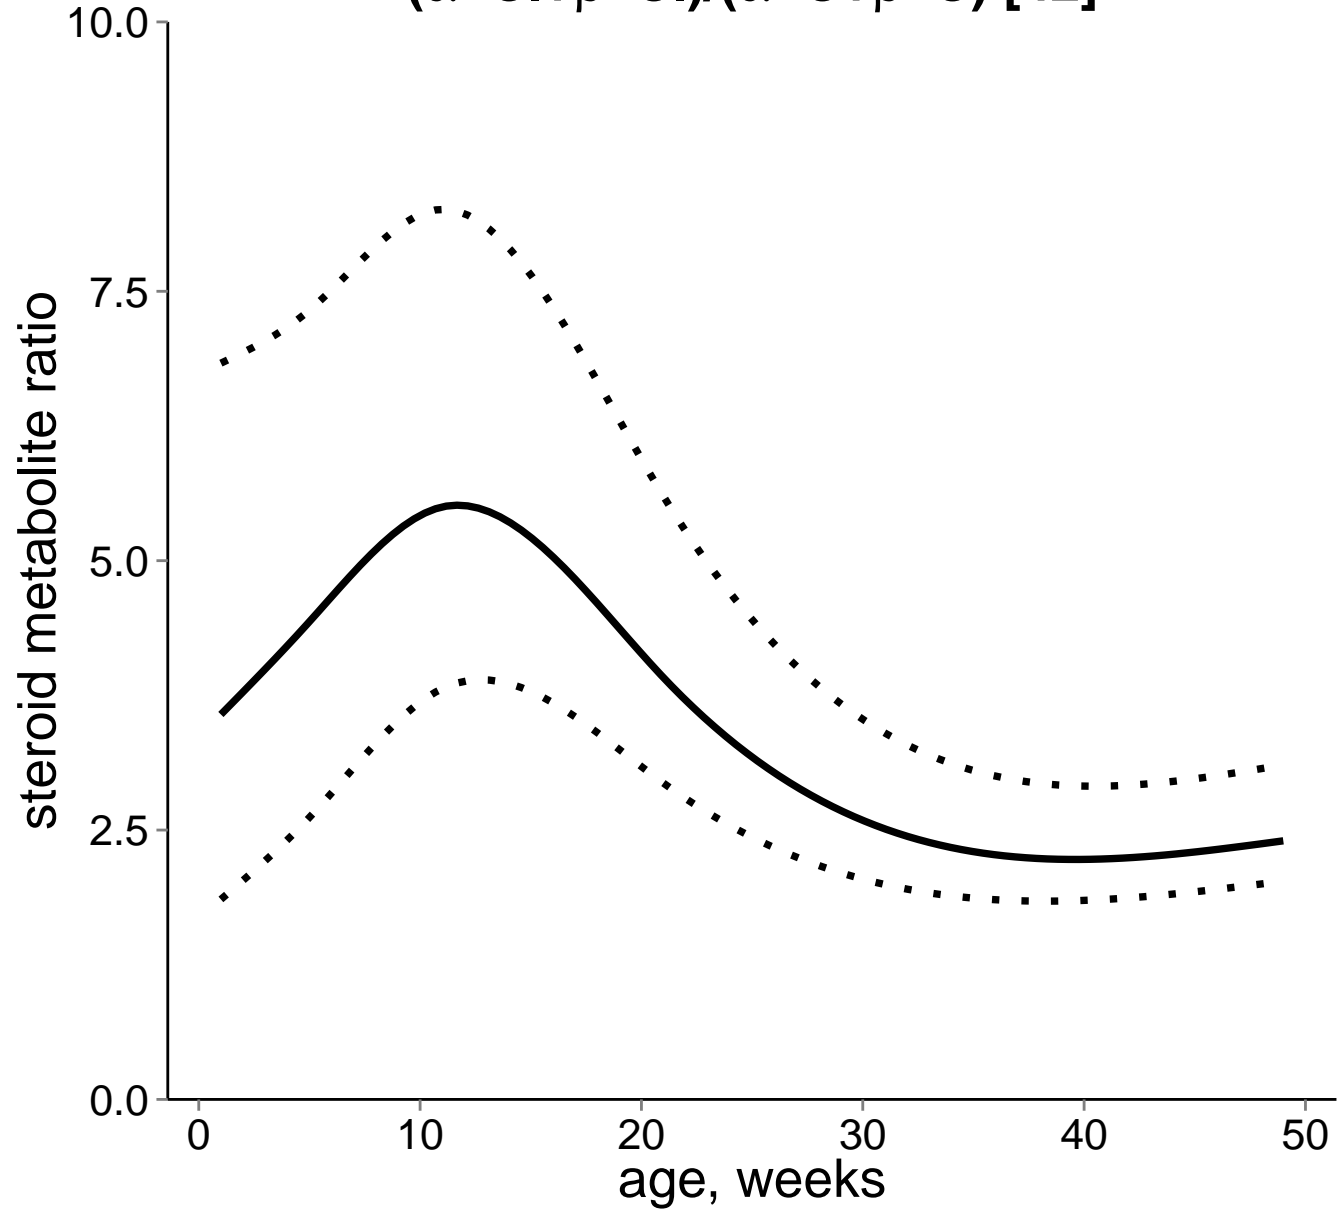

**11 $\beta$ -HSD type 1: ( $\alpha$ Cl+ $\beta$ Cl+  
6OH $\alpha$ Cl+1 $\beta$ OH $\beta$ Cl+6OH $\beta$ Cl)/( $\alpha$ C+ $\beta$ C) [43]**

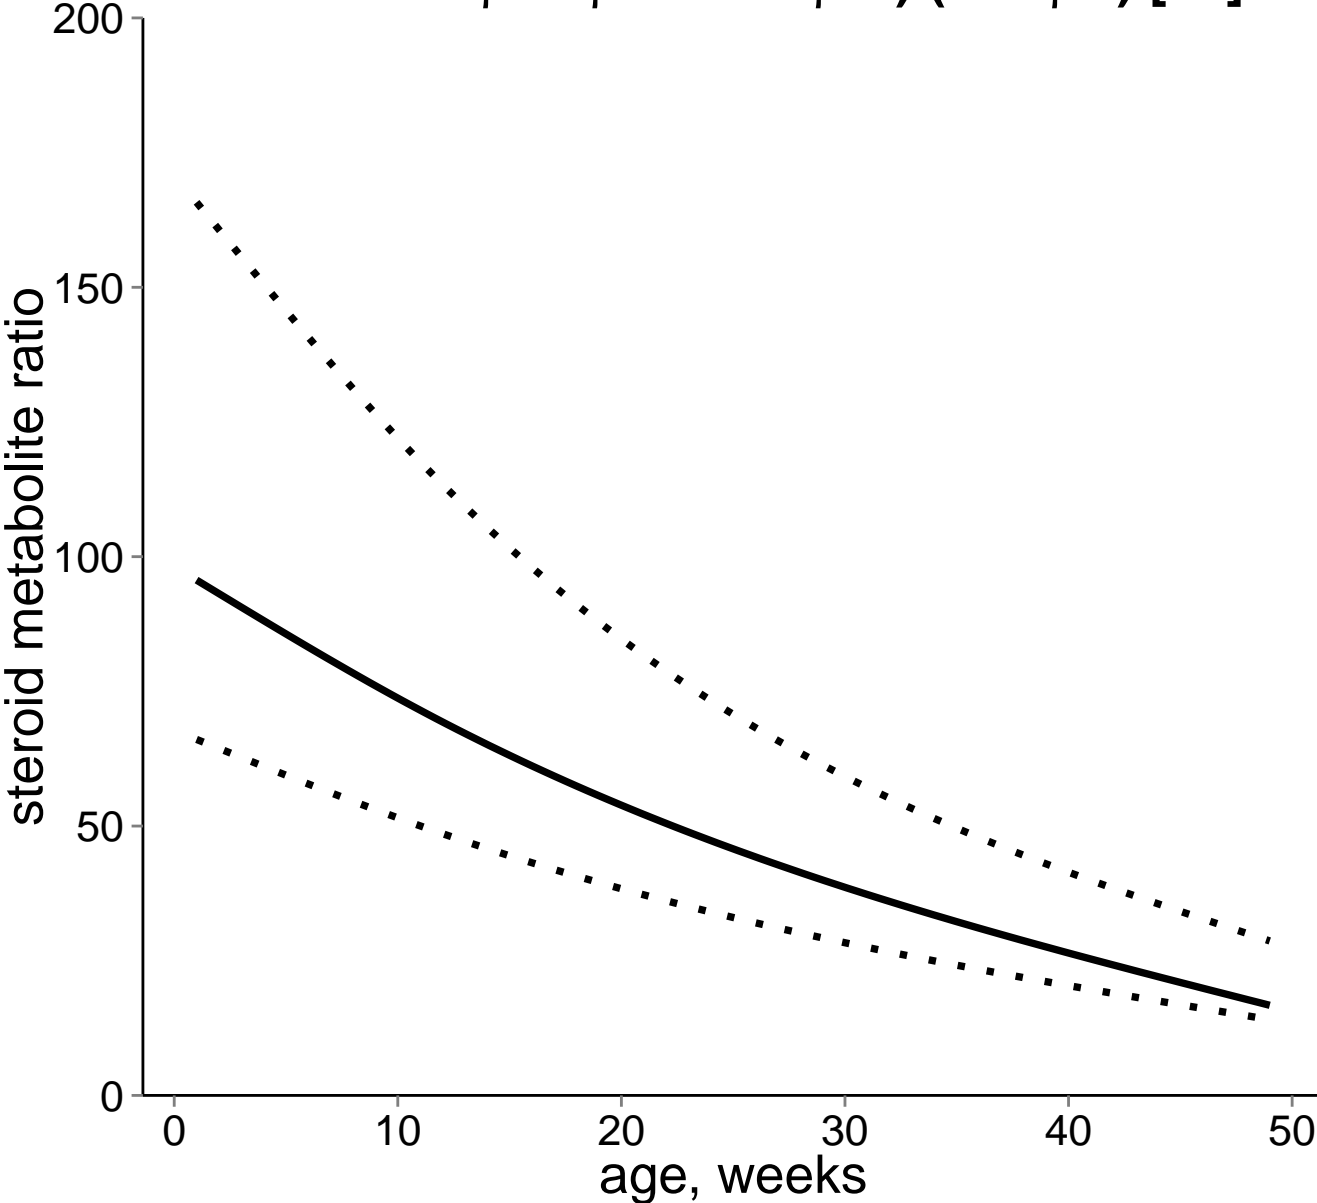

# 5 $\alpha$ -reductase THF/5 $\alpha$ THF [44]

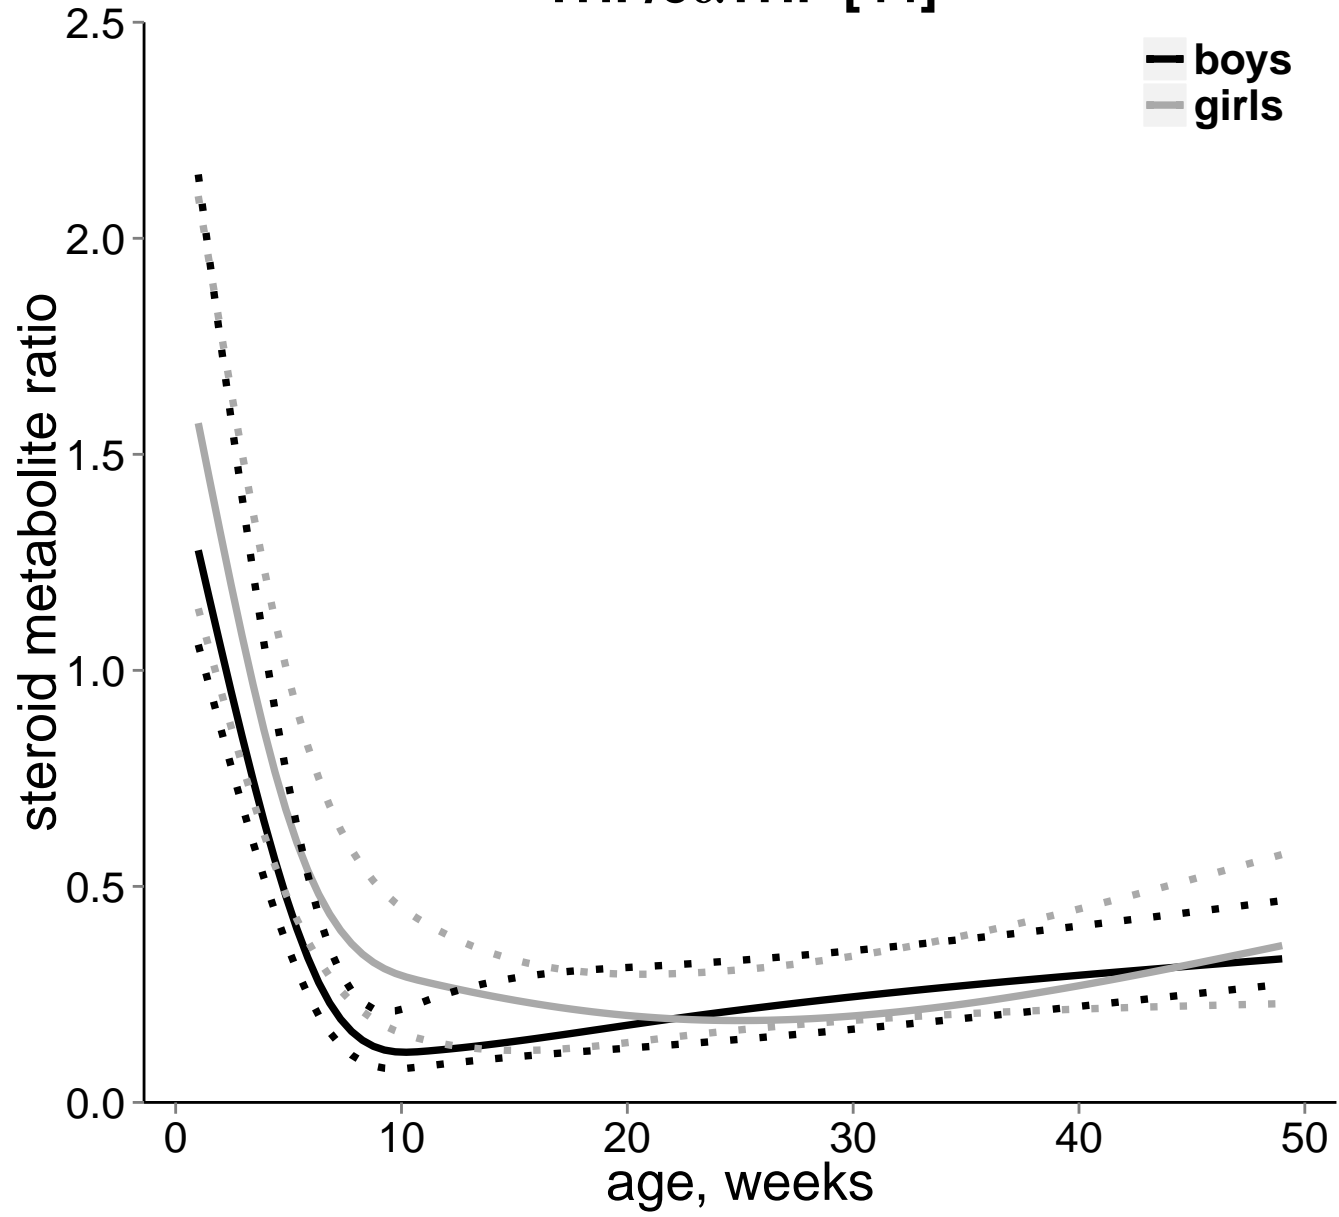



# 5 $\alpha$ -reductase THB/5 $\alpha$ THB [45]

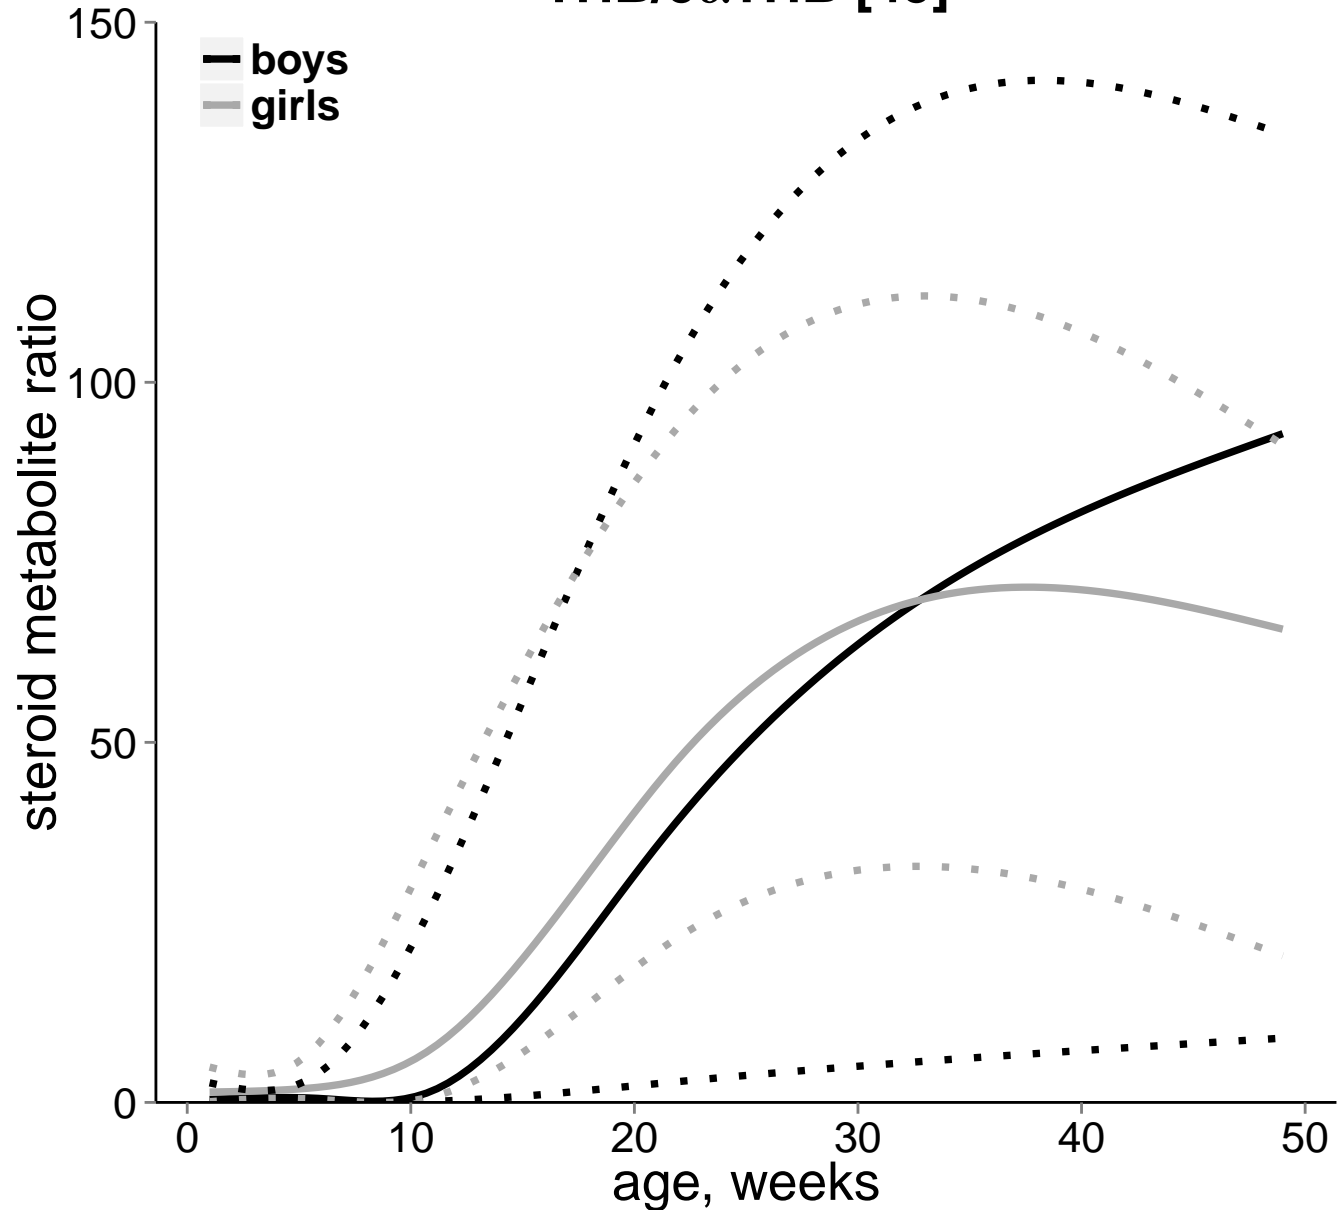

Supplement: mmc1 [file mmc1.pdf]
